# Supplementary material for: Extinction, absorption, and scattering of light by plasmonic spheres embedded in an absorbing host medium
Source: Royal Society of Chemistry journal article supplement (doi:10.1039/d1cp03057d), 2021-01-01
Supplement: d1cp03057d1.pdf [file d1cp03057d1.pdf]

## Electronic Supplementary Information

### Extinction, absorption, and scattering of light by plasmonic spheres embedded in an absorbing host medium

Nikolai G. Khlebtsov<sup>1,2</sup>

<sup>1</sup>Institute of Biochemistry and Physiology of Plants and Microorganisms, Russian Academy of Sciences, 13 Prospekt Entuziastov, Saratov 410049, Russia

<sup>2</sup>Saratov State University, 83 Ulitsa Astrakhanskaya, Saratov 410012, Russia

Section S1. Derivation of IEA polarizability  $\beta^{IEA}$

Section S2. Size-corrected dielectric function of gold nanoparticles and optical constants of bulk gold for 300-2300 nm.

Section S3. Optical constants of bulk silver for 250-1450 nm.

Section S4. Comparison of small-particle approximations with LM theory for the absorption cross section.

Section S5. Comparison of the EA and LM near-field and far-field efficiencies for Au spheres embedded in a lossless PMMA and a lossy P3HT matrix.

Section S6. Comparison of LM, IEA, and FDTD FF extinction and scattering spectra for a 10-nm Au sphere in a lossy P3HT and dielectric water hosts.

## Section S1. Derivation of IEA polarizability $\beta^{IEA}$

To obtain the IEA polarizability, we apply the general method developed by Le Ru *et al.* [1]. In this method, the radiative correction to the generalized polarizability is introduced through the reactance matrix  $\mathbf{K}$ , which is related to the known T-matrix [2]  $\mathbf{T}$  by the following relation [1]:

$$\mathbf{T}^{-1} = -i\mathbf{K}^{-1} - \mathbf{1}, \quad (\text{S1})$$

The T-matrix method [2] provides an exact solution to the EM scattering problem. Beyond EA, the T-matrix itself can be considered a generalization of the concept of polarizability to higher orders [1]. For example, the lowest-order T-matrix elements for spheroids  $T_{11,m=0}^{22}$  and  $T_{11,m=1}^{22}$  correspond to the dipolar polarizabilities along the symmetry axes. For spheres, the T-matrix is completely diagonal [2] and its elements are proportional to the Mie scattering coefficients. According to Eq. (39) of Ref. [1], we define the generalized polarizability through the lowest order T-matrix element  $T_{11}^{22}$

$$\beta^{IEA} = -\frac{3i}{2x_1^3} T_{11}^{22}, \quad (\text{S2})$$

or, equivalently, through the lowest order K-matrix element  $K_{11}^{22}$

$$\beta^{IEA} = \frac{3}{2x_1^3} \frac{K_{11}^{22}}{1 - iK_{11}^{22}}, \quad (\text{S3})$$

where

$$T_{11}^{22} = -\frac{P_{11}^{22}}{Q_{11}^{22}}, \quad (\text{S4a})$$

$$K_{11}^{22} = -\frac{P_{11}^{22}}{U_{11}^{22}}. \quad (\text{S4b})$$

The explicit expressions for  $P_{11}^{22}$ ,  $Q_{11}^{22}$  and  $U_{11}^{22}$  read

$$P_{11}^{22} = (n_2/n_1)\psi'_n(x_1)\psi_n(x_2) - \psi_n(x_1)\psi'_n(x_2) \quad (\text{S5})$$

$$Q_{11}^{22} = \xi_n(x_1)\psi'_n(x_2) - (n_2/n_1)\xi'_n(x_1)\psi_n(x_2) \quad (\text{S6})$$

$$U_{11}^{22} = \chi_n(x_1)\psi'_n(x_2) - (n_2/n_1)\chi'_n(x_1)\psi_n(x_2) \quad (\text{S7})$$

where  $\xi_n(z) = \psi_n(z) + i\chi_n(z)$  are the Riccati–Bessel functions of a complex argument  $z$ .

Note that here we have generalized the derivation and formulae of Ref. [1] to the case of absorbing host. Inserting (S5) and (S6) into Eq. (S4a) gives

$$T_{11}^{22} = -a_1, \quad (\text{S8})$$

where  $a_1$  is the first electric Mie coefficient. It can be easily verified that the substitution of expressions (S5) and (S7) in (S4b) results in a particular form of general relation (S1). After substitution of Eq. (S8) in Eq. (S2), we get the final result

$$\beta^{IEA} = \frac{3i}{2x_1^3} a_1. \quad (\text{S9})$$

This coincides with Eq. (28) of the main text.

## Section S2. Size-corrected dielectric function of plasmonic nanoparticles and optical constants of bulk gold

The size-corrected dielectric functions of small plasmonic particles can be represented as

$$\varepsilon_p(\omega, l_{\text{eff}}) = \varepsilon_b(\omega) + \Delta\varepsilon(\omega, l_{\text{eff}}), \quad (\text{S10})$$

with the Lorentz–Drude correction [3] to the tabulated bulk value  $\varepsilon_b(\omega)$ :

$$\Delta\varepsilon(\omega, l_{\text{eff}}) = \frac{\omega_p^2}{\omega^2 + i\omega\gamma_b} - \frac{\omega_p^2}{\omega^2 + i\omega(\gamma_b + \gamma_p)}, \quad (\text{S11})$$

where  $i = \sqrt{-1}$ ,  $\omega_p$  is the plasma frequency;  $\gamma_b$  is the damping constant of bulk Au;  $l_{\text{eff}}$  is the effective path length of the electrons; and  $\gamma_p = \gamma_p(l_{\text{eff}})$  takes into account three possible contributions from radiation damping [4], surface-electron scattering [5], and chemical interface damping (CID):[6, 7]

$$\gamma_p = \gamma_p^{\text{rad}} + \gamma_p^{\text{surf}} + \gamma_p^{\text{CID}}. \quad (\text{S12})$$

For small spheres of a radius  $R$ , Eq. (S12) can be rewritten as

$$\Delta\varepsilon(\omega, l_{\text{eff}}) = \frac{\omega_p^2}{\omega(\omega + i\gamma_b)} - \frac{\omega_p^2}{\omega(\omega + i\gamma_s)}, \quad (\text{S13})$$

where

$$\gamma_s = \gamma_b + A_s v_F / R, \quad (\text{S14})$$

is the damping parameter, the damping constant  $A_s$  includes all possible mechanisms of the surface electron scattering and the chemical interface dumping contributions. In Eq. (S15), the effective path length of the electrons was set to be  $l_{\text{eff}} = R$ . Coronado and Schatz [8] discussed geometrical models to evaluate  $l_{\text{eff}}$  for particles of different shapes. The separation of Eq. (S13) into real and imaginary parts gives

$$\Delta\varepsilon(\omega, l_s) = \frac{\omega_p^2}{\omega^2} \left[ \frac{1}{(1 + \gamma_b^2 / \omega^2)} - \frac{1}{(1 + \gamma_s^2 / \omega^2)} \right] + i \frac{\omega_p^2}{\omega^2} \left[ \frac{\gamma_s / \omega}{(1 + \gamma_s^2 / \omega^2)} - \frac{\gamma_b / \omega}{(1 + \gamma_b^2 / \omega^2)} \right]. \quad (\text{S15})$$

Under conditions  $\gamma_s^2 / \omega^2 \ll 1$ ,  $\gamma_b^2 / \omega^2 \ll 1$ , we arrive at:

$$\Delta\varepsilon(\omega, l_s) = |\Delta\varepsilon''| \left( \frac{\gamma_s + \gamma_b}{\omega} + i \right), \quad (\text{S16})$$

$$|\Delta\varepsilon''| = \frac{\omega_p^2}{\omega^3} [\gamma_s - \gamma_b] = \frac{\omega_p^2}{\omega^3} A_s \frac{v_F}{R} = \frac{\lambda^3}{2\pi c \lambda_p^2} A_s \frac{v_F}{R}, \quad (\text{S17})$$

where  $\lambda_p = 2\pi c / \omega_p$  is plasma wavelength,  $c$  is the speed of light. Eq. (S16) can be normalized as follows

$$|\Delta\varepsilon''| = \frac{\lambda^3}{2\pi c \lambda_p^2} A_s \frac{v_F}{R} = 5.37(\text{nm}) \frac{A_s}{R(\text{nm})} \left( \frac{\lambda}{520} \right)^3, \quad (\text{S18})$$

where the wavelength is expressed in nm and normalized to the LPR wavelength of small gold spheres in water.

Table 1 summarizes the literature data for bulk parameters of gold. The average value of plasma frequency is  $\hbar\omega_p = 9.0 \pm 0.38$  eV. In Table 1, the damping constant  $\gamma_b = 1.64 \times 10^{14} \text{s}^{-1}$  seems to be overestimated compared with other literature data. The average value of the damping constant equals  $\gamma_b = (1.02 \pm 0.17) \times 10^{14} \text{s}^{-1}$ , where the first value has not been taken into account.

**Table S1.** Parameters of the Lorenz-Drude model for bulk gold

| $\hbar\gamma_b$<br>eV | $\gamma_b$<br>$10^{14} \text{s}^{-1}$ | $\hbar\omega_p$<br>eV | $\omega_p$<br>$10^{16} \text{s}^{-1}$ | $\lambda_p$<br>nm | Refs. |
|-----------------------|---------------------------------------|-----------------------|---------------------------------------|-------------------|-------|
| 0.108                 | 1.64                                  | 8.85                  | 1.34                                  | 140               | [9]   |
| 0.0708                | 1.08                                  | 9.48                  | 1.37                                  | 138               | [10]  |
| 0.0708                | 1.08                                  | 9.48                  | 1.44                                  | 131               | [11]  |
| 0.0691                | 1.05                                  | 8.95                  | 1.36                                  | 139               | [12]  |
| 0.0829                | 1.26                                  | 8.71                  | 1.32                                  | 143               | [13]  |
| 0.047*                | 0.714*                                | 8.45                  | 1.28                                  | 147               | [14]  |
| 0.055**               | 0.833**                               |                       |                                       |                   |       |
| 0.053                 | 0.803                                 | 9.07                  | 1.38                                  | 137               | [15]  |

\*TS sample; \*\*SC sample<sup>14</sup>

## Optical constants of bulk gold for 300-2300 nm

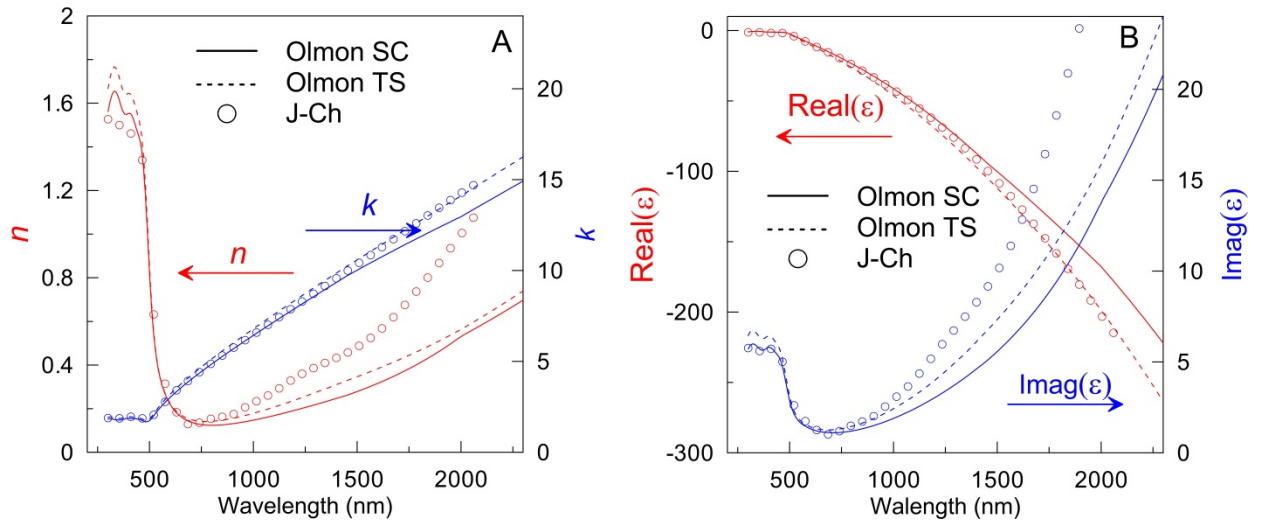

**Figure S1.** Spectral dependencies of the complex refractive index (A) and the dielectric function (B) by a cubic spline interpolation (solid lines) of tabulated data by Johnson and Christy<sup>10</sup> and Olmon *et al.*<sup>14</sup> (TS and SC samples; see FORTRAN subroutine Olmon below). Note significant differences between Johnson and Christy and Olmon *et al.* data for wavelengths larger than 1000 nm.

### FORTAN subroutine for spline calculating Real (n) and Imag (n) of bulk gold and size-corrected optical constants ref=n, eps=n<sup>2</sup>

#### subroutine Olmon(wavel,R,ref,eps,KD,KS)

```
IMPLICIT REAL*8(A-H,O-Z)
```

```
REAL*8 MN,MK
```

```
DIMENSION XN(1000),YN(1000),MN(1000),XK(1000),YK(1000),MK(1000)
```

```
complex*16 ref, eps,epsb,Dep,aim
```

- C wavelength wavel and radius R should be given in nm
- C ref and eps are the output parameters:
- C the size-corrected complex refractive index and dielectric function, respectively
- C the parameter KD=0, 1, 2 defines the size-correction options (see below)
- C the parameter KS=0, 1 defines the type of Au sample in Olmon et al. measurements
- C KS=0 corresponds to the TS sample, KS=1 corresponds to the SC sample
- C aim=csqrt(-1.)
- C aim=(0.d0,1.d0)
- C N=258 is the number of interpolation points
- C N=258
- C wavel is the wavelength in vacuum in nm
- C xx=wavel

```
xn(1)=299.9859497
xn(2)=310.037992
xn(3)=320.0417992
xn(4)=330.0084988
xn(5)=339.9621415
xn(6)=350.0400706
xn(7)=360.0005604
xn(8)=369.9916234
xn(9)=379.9699448
xn(10)=390.010044
xn(11)=399.9490097
xn(12)=410.0006382
```

xn(13)=420.0006538  
xn(14)=430.0526986  
xn(15)=439.972296  
xn(16)=450.0333684  
xn(17)=460.0526642  
xn(18)=469.9931501  
xn(19)=480.0007472  
xn(20)=490.0560988  
xn(21)=499.9362621  
xn(22)=510.0131345  
xn(23)=520.0679237  
xn(24)=530.0735058  
xn(25)=540.0008406  
xn(26)=550.0629681  
xn(27)=560.0008717  
xn(28)=570.0422667  
xn(29)=579.9073573  
xn(30)=590.1199096  
xn(31)=600.1171007  
xn(32)=609.858303  
xn(33)=619.920965  
xn(34)=630.0009807  
xn(35)=640.0835983  
xn(36)=650.1530834  
xn(37)=659.8413677  
xn(38)=669.8227607  
xn(39)=680.110768  
xn(40)=689.9509905  
xn(41)=700.0801412  
xn(42)=710.1041982  
xn(43)=720.0011208  
xn(44)=730.1778151  
xn(45)=740.2041373  
xn(46)=750.055614  
xn(47)=760.1728571  
xn(48)=770.0881553  
xn(49)=779.7747987  
xn(50)=790.2115551  
xn(51)=799.8980194  
xn(52)=809.8249053  
xn(53)=820.0012765  
xn(54)=829.8808099  
xn(55)=840.0013076  
xn(56)=849.7888485  
xn(57)=859.8071637  
xn(58)=870.0645123  
xn(59)=879.9445919  
xn(60)=890.0516368  
xn(61)=899.7401524  
xn(62)=910.3097871  
xn(63)=919.764043  
xn(64)=930.113976  
xn(65)=939.9863002  
xn(66)=950.0704444  
xn(67)=960.3732998  
xn(68)=970.1423552  
xn(69)=980.1121976  
xn(70)=990.2890815  
xn(71)=999.8725242  
xn(72)=1009.643265  
xn(73)=1019.60685  
xn(74)=1029.769045  
xn(75)=1040.135847  
xn(76)=1049.823819  
xn(77)=1059.693957  
xn(78)=1069.75145  
xn(79)=1080.001681  
xn(80)=1090.450246  
xn(81)=1100.125936  
xn(82)=1109.97487  
xn(83)=1120.001743  
xn(84)=1130.211422  
xn(85)=1139.560597  
xn(86)=1150.13166  
xn(87)=1159.814715  
xn(88)=1169.662198  
xn(89)=1179.678335  
xn(90)=1189.867495  
xn(91)=1200.234201

xn(92)=1209.601883  
xn(93)=1220.31686  
xn(94)=1230.001915  
xn(95)=1239.965927  
xn(96)=1249.96666  
xn(97)=1260.001961  
xn(98)=1269.939496  
xn(99)=1280.03503  
xn(100)=1290.023858  
xn(101)=1300.03348  
xn(102)=1310.061211  
xn(103)=1319.963728  
xn(104)=1330.017089  
xn(105)=1339.935081  
xn(106)=1350.002101  
xn(107)=1430.036828  
xn(108)=1440.002242  
xn(109)=1449.937937  
xn(110)=1460.011693  
xn(111)=1470.052087  
xn(112)=1480.054829  
xn(113)=1490.015539  
xn(114)=1499.929748  
xn(115)=1509.976775  
xn(116)=1519.972943  
xn(117)=1529.913537  
xn(118)=1539.985008  
xn(119)=1549.996162  
xn(120)=1559.942036  
xn(121)=1570.016373  
xn(122)=1580.020301  
xn(123)=1589.948615  
xn(124)=1600.002491  
xn(125)=1609.975237  
xn(126)=1620.073082  
xn(127)=1630.084052  
xn(128)=1640.002553  
xn(129)=1650.042494  
xn(130)=1659.98384  
xn(131)=1670.045703  
xn(132)=1680.002615  
xn(133)=1690.078967  
xn(134)=1700.043782  
xn(135)=1709.890953  
xn(136)=1720.091468  
xn(137)=1729.931533  
xn(138)=1739.88483  
xn(139)=1749.953324  
xn(140)=1759.889184  
xn(141)=1769.938515  
xn(142)=1780.103274  
xn(143)=1790.126956  
xn(144)=1800.002802  
xn(145)=1809.988219  
xn(146)=1820.085041  
xn(147)=1830.024989  
xn(148)=1840.074102  
xn(149)=1849.958117  
xn(150)=1859.94889  
xn(151)=1870.04816  
xn(152)=1879.9726  
xn(153)=1890.002942  
xn(154)=1900.140889  
xn(155)=1910.093868  
xn(156)=1920.151665  
xn(157)=1930.015458  
xn(158)=1939.981114  
xn(159)=1950.05022  
xn(160)=1959.914527  
xn(161)=1969.879139  
xn(162)=1979.945592  
xn(163)=1990.115457  
xn(164)=2000.06764  
xn(165)=2006.541398  
xn(166)=2018.95771  
xn(167)=2025.554534  
xn(168)=2038.208006  
xn(169)=2044.594212  
xn(170)=2057.487438

xn(171)=2063.995222  
xn(172)=2077.135081  
xn(173)=2084.118222  
xn(174)=2097.516376  
xn(175)=2104.280261  
xn(176)=2117.939751  
xn(177)=2124.836213  
xn(178)=2139.133765  
xn(179)=2146.169171  
xn(180)=2153.251007  
xn(181)=2167.555822  
xn(182)=2174.77974  
xn(183)=2189.759679  
xn(184)=2197.132607  
xn(185)=2204.555352  
xn(186)=2219.552327  
xn(187)=2227.127591  
xn(188)=2234.75474  
xn(189)=2242.43431  
xn(190)=2258.364171  
xn(191)=2266.207147  
xn(192)=2274.104787  
xn(193)=2282.057666  
xn(194)=2298.131474  
xn(195)=2306.68266  
xn(196)=2314.865441  
xn(197)=2323.106483  
xn(198)=2339.765861  
xn(199)=2348.185473  
xn(200)=2356.6659  
xn(201)=2365.207802  
xn(202)=2373.811851  
xn(203)=2382.936633  
xn(204)=2391.67039  
xn(205)=2409.331384  
xn(206)=2418.260055  
xn(207)=2427.255149  
xn(208)=2436.31741  
xn(209)=2445.930026  
xn(210)=2455.132535  
xn(211)=2464.404552  
xn(212)=2473.746868  
xn(213)=2483.160284  
xn(214)=2492.645617  
xn(215)=2502.203693  
xn(216)=2512.344336  
xn(217)=2522.054373  
xn(218)=2531.839759  
xn(219)=2541.701374  
xn(220)=2551.640111  
xn(221)=2561.65688  
xn(222)=2571.752603  
xn(223)=2581.928217  
xn(224)=2592.726746  
xn(225)=2603.069347  
xn(226)=2613.494793  
xn(227)=2624.004085  
xn(228)=2634.598236  
xn(229)=2645.27828  
xn(230)=2656.045266  
xn(231)=2666.900258  
xn(232)=2678.422834  
xn(233)=2689.461887  
xn(234)=2700.592311  
xn(235)=2711.815245  
xn(236)=2723.131847  
xn(237)=2734.543295  
xn(238)=2746.050786  
xn(239)=2757.655538  
xn(240)=2769.977502  
xn(241)=2781.785798  
xn(242)=2793.695201  
xn(243)=2805.707015  
xn(244)=2817.822568  
xn(245)=2830.043209  
xn(246)=2842.370312  
xn(247)=2854.805273  
xn(248)=2868.012792  
xn(249)=2880.673629



```
xn(250)=2893.446744
xn(251)=2906.333638
xn(252)=2919.335837
xn(253)=2932.454896
xn(254)=2945.692397
xn(255)=2959.756338
xn(256)=2973.242038
xn(257)=2986.851192
xn(258)=3000.585503
```

C

```
do i=1,N
xk(i)=xn(i)
end do
```

C

```
if(KS.eq.0) then
```

C

```
TS sample Spline parameters Real n
```

```
yn(1)=1.667
yn(2)=1.719
yn(3)=1.754
yn(4)=1.767
yn(5)=1.759
yn(6)=1.732
yn(7)=1.696
yn(8)=1.664
yn(9)=1.645
yn(10)=1.642
yn(11)=1.645
yn(12)=1.641
yn(13)=1.621
yn(14)=1.59
yn(15)=1.556
yn(16)=1.52
yn(17)=1.466
yn(18)=1.372
yn(19)=1.227
yn(20)=1.041
yn(21)=0.8463
yn(22)=0.678
yn(23)=0.5507
yn(24)=0.46
yn(25)=0.3953
yn(26)=0.3476
yn(27)=0.3111
yn(28)=0.2822
yn(29)=0.2587
yn(30)=0.2392
yn(31)=0.2228
yn(32)=0.209
yn(33)=0.1973
yn(34)=0.1874
yn(35)=0.1789
yn(36)=0.1717
yn(37)=0.1656
yn(38)=0.1604
yn(39)=0.1561
yn(40)=0.1524
yn(41)=0.1494
yn(42)=0.147
yn(43)=0.145
yn(44)=0.1435
yn(45)=0.1424
yn(46)=0.1416
yn(47)=0.1411
yn(48)=0.141
yn(49)=0.141
yn(50)=0.1414
yn(51)=0.1419
yn(52)=0.1426
yn(53)=0.1435
yn(54)=0.1445
yn(55)=0.1457
yn(56)=0.1471
yn(57)=0.1486
yn(58)=0.1501
yn(59)=0.1518
yn(60)=0.1536
yn(61)=0.1555
yn(62)=0.1575
```

yn(63)=0.1596  
yn(64)=0.1617  
yn(65)=0.1639  
yn(66)=0.1662  
yn(67)=0.1686  
yn(68)=0.171  
yn(69)=0.1734  
yn(70)=0.176  
yn(71)=0.1786  
yn(72)=0.1812  
yn(73)=0.1839  
yn(74)=0.1866  
yn(75)=0.1894  
yn(76)=0.1923  
yn(77)=0.1951  
yn(78)=0.198  
yn(79)=0.201  
yn(80)=0.204  
yn(81)=0.207  
yn(82)=0.2101  
yn(83)=0.2132  
yn(84)=0.2163  
yn(85)=0.2195  
yn(86)=0.2227  
yn(87)=0.226  
yn(88)=0.2292  
yn(89)=0.2325  
yn(90)=0.2359  
yn(91)=0.2392  
yn(92)=0.2426  
yn(93)=0.2461  
yn(94)=0.2495  
yn(95)=0.253  
yn(96)=0.2565  
yn(97)=0.26  
yn(98)=0.2636  
yn(99)=0.2672  
yn(100)=0.2708  
yn(101)=0.2744  
yn(102)=0.2781  
yn(103)=0.2813  
yn(104)=0.2845  
yn(105)=0.2878  
yn(106)=0.291  
yn(107)=0.3214  
yn(108)=0.3249  
yn(109)=0.3284  
yn(110)=0.3319  
yn(111)=0.3355  
yn(112)=0.339  
yn(113)=0.3426  
yn(114)=0.3462  
yn(115)=0.3498  
yn(116)=0.3535  
yn(117)=0.3571  
yn(118)=0.3608  
yn(119)=0.3646  
yn(120)=0.3683  
yn(121)=0.3721  
yn(122)=0.3759  
yn(123)=0.3797  
yn(124)=0.3835  
yn(125)=0.3874  
yn(126)=0.3913  
yn(127)=0.3952  
yn(128)=0.3991  
yn(129)=0.4031  
yn(130)=0.4071  
yn(131)=0.4112  
yn(132)=0.4152  
yn(133)=0.4193  
yn(134)=0.4234  
yn(135)=0.4276  
yn(136)=0.4317  
yn(137)=0.4359  
yn(138)=0.4402  
yn(139)=0.4444  
yn(140)=0.4487  
yn(141)=0.4531

yn(142)=0.4574  
yn(143)=0.4618  
yn(144)=0.4663  
yn(145)=0.4708  
yn(146)=0.4752  
yn(147)=0.4798  
yn(148)=0.4844  
yn(149)=0.489  
yn(150)=0.4936  
yn(151)=0.4983  
yn(152)=0.503  
yn(153)=0.5078  
yn(154)=0.5126  
yn(155)=0.5175  
yn(156)=0.5223  
yn(157)=0.5273  
yn(158)=0.5322  
yn(159)=0.5373  
yn(160)=0.5424  
yn(161)=0.5474  
yn(162)=0.5526  
yn(163)=0.5578  
yn(164)=0.5622  
yn(165)=0.5667  
yn(166)=0.5736  
yn(167)=0.5771  
yn(168)=0.5842  
yn(169)=0.5878  
yn(170)=0.5952  
yn(171)=0.5989  
yn(172)=0.6064  
yn(173)=0.6102  
yn(174)=0.618  
yn(175)=0.6219  
yn(176)=0.6299  
yn(177)=0.6339  
yn(178)=0.6421  
yn(179)=0.6463  
yn(180)=0.6505  
yn(181)=0.6591  
yn(182)=0.6634  
yn(183)=0.6722  
yn(184)=0.6767  
yn(185)=0.6812  
yn(186)=0.6903  
yn(187)=0.695  
yn(188)=0.6997  
yn(189)=0.7044  
yn(190)=0.7141  
yn(191)=0.719  
yn(192)=0.7239  
yn(193)=0.7289  
yn(194)=0.7391  
yn(195)=0.7442  
yn(196)=0.7494  
yn(197)=0.7547  
yn(198)=0.7654  
yn(199)=0.7708  
yn(200)=0.7763  
yn(201)=0.7819  
yn(202)=0.7875  
yn(203)=0.7932  
yn(204)=0.7989  
yn(205)=0.8106  
yn(206)=0.8165  
yn(207)=0.8225  
yn(208)=0.8286  
yn(209)=0.8347  
yn(210)=0.8409  
yn(211)=0.8472  
yn(212)=0.8535  
yn(213)=0.8599  
yn(214)=0.8664  
yn(215)=0.873  
yn(216)=0.8796  
yn(217)=0.8863  
yn(218)=0.8931  
yn(219)=0.8999  
yn(220)=0.9069

yn(221)=0.9139  
yn(222)=0.921  
yn(223)=0.9282  
yn(224)=0.9355  
yn(225)=0.9428  
yn(226)=0.9503  
yn(227)=0.9578  
yn(228)=0.9655  
yn(229)=0.9732  
yn(230)=0.981  
yn(231)=0.9889  
yn(232)=0.9969  
yn(233)=1.005  
yn(234)=1.013  
yn(235)=1.022  
yn(236)=1.03  
yn(237)=1.038  
yn(238)=1.047  
yn(239)=1.056  
yn(240)=1.065  
yn(241)=1.074  
yn(242)=1.083  
yn(243)=1.092  
yn(244)=1.101  
yn(245)=1.111  
yn(246)=1.12  
yn(247)=1.13  
yn(248)=1.139  
yn(249)=1.149  
yn(250)=1.159  
yn(251)=1.17  
yn(252)=1.18  
yn(253)=1.19  
yn(254)=1.201  
yn(255)=1.212  
yn(256)=1.223  
yn(257)=1.234  
yn(258)=1.245

C

mn(1)=-0.1524273019E-03  
mn(2)=-0.1524273019E-03  
mn(3)=-0.2399223450E-03  
mn(4)=-0.2065229207E-03  
mn(5)=-0.2038618210E-03  
mn(6)=-0.1021415376E-03  
mn(7)=5.391957312E-005  
mn(8)=0.000133552102  
mn(9)=0.0001923957612  
mn(10)=5.940299086E-005  
mn(11)=-0.7057478066E-04  
mn(12)=-0.1957361553E-03  
mn(13)=-0.1053251955E-03  
mn(14)=-0.3207085087E-04  
mn(15)=2.803498725E-005  
mn(16)=-0.1695365121E-03  
mn(17)=-0.4333706503E-03  
mn(18)=-0.5433802081E-03  
mn(19)=-0.4206389112E-03  
mn(20)=-0.1725724564E-03  
mn(21)=0.0003905884493  
mn(22)=0.0004110716963  
mn(23)=0.0003738358622  
mn(24)=0.0002440987556  
mn(25)=0.0001827119006  
mn(26)=9.272259691E-005  
mn(27)=8.644361086E-005  
mn(28)=3.9107112E-005  
mn(29)=5.582399758E-005  
mn(30)=2.045619589E-005  
mn(31)=2.168515224E-005  
mn(32)=2.897205493E-005  
mn(33)=1.639084117E-005  
mn(34)=1.305458033E-005  
mn(35)=1.418166918E-005  
mn(36)=6.436813542E-006  
mn(37)=1.189836085E-005  
mn(38)=1.217334038E-005  
mn(39)=5.625120807E-007  
mn(40)=1.055297079E-005

mn(41)=5.13266774E-006  
mn(42)=2.666896676E-006  
mn(43)=6.703240244E-006  
mn(44)=3.204760292E-006  
mn(45)=2.832329986E-006  
mn(46)=2.669423561E-006  
mn(47)=5.554927862E-006  
mn(48)=-0.1367072964E-05  
mn(49)=6.093788393E-006  
mn(50)=-0.1970564037E-06  
mn(51)=2.486507343E-006  
mn(52)=1.788494009E-006  
mn(53)=1.076536017E-006  
mn(54)=1.547939399E-006  
mn(55)=3.118225136E-006  
mn(56)=7.136710083E-007  
mn(57)=-0.1863466392E-05  
mn(58)=4.629005982E-006  
mn(59)=-0.1250770117E-05  
mn(60)=4.001654718E-006  
mn(61)=-0.3891119482E-05  
mn(62)=7.338061616E-006  
mn(63)=-0.5853453691E-05  
mn(64)=4.554228978E-006  
mn(65)=-0.3989695329E-06  
mn(66)=2.357217756E-007  
mn(67)=2.290409003E-006  
mn(68)=-0.1842857399E-05  
mn(69)=2.075303662E-006  
mn(70)=2.287708556E-006  
mn(71)=-0.1733206262E-05  
mn(72)=1.428907365E-006  
mn(73)=-0.1018213069E-05  
mn(74)=-0.4949059562E-06  
mn(75)=5.506115788E-006  
mn(76)=-0.4152897421E-05  
mn(77)=1.536423846E-006  
mn(78)=7.660805399E-007  
mn(79)=-0.2006094547E-05  
mn(80)=4.006454642E-006  
mn(81)=-0.2775141494E-06  
mn(82)=2.723930442E-008  
mn(83)=-0.3177846095E-05  
mn(84)=9.31762294E-006  
mn(85)=-0.1071569811E-04  
mn(86)=9.689506723E-006  
mn(87)=-0.5235758405E-05  
mn(88)=1.585956179E-006  
mn(89)=1.560154939E-006  
mn(90)=-0.5261896434E-05  
mn(91)=1.044322901E-005  
mn(92)=-0.9596132540E-05  
mn(93)=6.512041612E-006  
mn(94)=-0.1693813576E-05  
mn(95)=4.757966665E-007  
mn(96)=-0.9859204715E-06  
mn(97)=2.741953236E-006  
mn(98)=-0.1878797056E-05  
mn(99)=1.387793512E-006  
mn(100)=-0.1393813877E-05  
mn(101)=3.735767225E-006  
mn(102)=-0.7960032629E-05  
mn(103)=4.917638956E-007  
mn(104)=2.994570167E-006  
mn(105)=-0.3830659164E-05  
mn(106)=3.402913423E-006  
mn(107)=-0.2534655876E-05  
mn(108)=1.220741021E-006  
mn(109)=-0.1713654575E-05  
mn(110)=2.728168942E-006  
mn(111)=-0.2569732393E-05  
mn(112)=2.372683077E-006  
mn(113)=6.643309589E-009  
mn(114)=-0.1384538121E-05  
mn(115)=2.628337047E-006  
mn(116)=-0.2049675089E-05  
mn(117)=7.557014498E-007  
mn(118)=2.131368532E-006  
mn(119)=-0.1998186968E-05

mn(120)=1.311094605E-006  
mn(121)=-0.1517119164E-06  
mn(122)=8.809150761E-007  
mn(123)=-0.1635932008E-05  
mn(124)=2.780304358E-006  
mn(125)=-0.1634469609E-05  
mn(126)=8.728103937E-007  
mn(127)=1.510507322E-007  
mn(128)=7.090971599E-007  
mn(129)=1.415964489E-007  
mn(130)=1.099441215E-006  
mn(131)=-0.1458696617E-05  
mn(132)=1.290647555E-006  
mn(133)=-0.6166590866E-06  
mn(134)=3.917620158E-006  
mn(135)=-0.5957273842E-05  
mn(136)=5.177586804E-006  
mn(137)=2.600721755E-007  
mn(138)=-0.3023698269E-05  
mn(139)=2.904323436E-006  
mn(140)=8.095759409E-007  
mn(141)=-0.3067922983E-05  
mn(142)=2.659760748E-006  
mn(143)=1.932717772E-006  
mn(144)=-0.3443067892E-06  
mn(145)=-0.3546215489E-05  
mn(146)=5.606799317E-006  
mn(147)=-0.2705077369E-05  
mn(148)=2.214035954E-006  
mn(149)=-0.1538359169E-05  
mn(150)=9.435752797E-007  
mn(151)=7.117802797E-007  
mn(152)=1.123949355E-006  
mn(153)=-0.2203542743E-05  
mn(154)=4.649228595E-006  
mn(155)=-0.5164061826E-05  
mn(156)=6.955902358E-006  
mn(157)=-0.4788222946E-05  
mn(158)=3.009281177E-006  
mn(159)=1.589432214E-006  
mn(160)=-0.3099240585E-05  
mn(161)=1.58476775E-006  
mn(162)=5.577203083E-006  
mn(163)=-0.2686300413E-04  
mn(164)=6.120818588E-005  
mn(165)=-0.3482661527E-04  
mn(166)=6.696582969E-006  
mn(167)=4.0624334E-006  
mn(168)=-0.1364679681E-05  
mn(169)=2.53474697E-006  
mn(170)=-0.2143997068E-05  
mn(171)=2.787550172E-006  
mn(172)=-0.6255001610E-05  
mn(173)=7.936717321E-006  
mn(174)=-0.3868442197E-05  
mn(175)=2.392981403E-006  
mn(176)=-0.1251098839E-05  
mn(177)=-0.2210865803E-05  
mn(178)=4.437512573E-006  
mn(179)=-0.2414404935E-05  
mn(180)=1.901494611E-006  
mn(181)=-0.1080520262E-05  
mn(182)=-0.2268088327E-05  
mn(183)=4.123621892E-006  
mn(184)=-0.1768926988E-05  
mn(185)=-0.3550874595E-06  
mn(186)=2.154980054E-006  
mn(187)=-0.1326924485E-05  
mn(188)=-0.1709332219E-06  
mn(189)=-0.1287072675E-05  
mn(190)=2.732089752E-006  
mn(191)=-0.1827711411E-05  
mn(192)=1.287024571E-006  
mn(193)=2.920029567E-006  
mn(194)=-0.7175356279E-05  
mn(195)=9.058908873E-006  
mn(196)=-0.9032067325E-06  
mn(197)=1.688217796E-007  
mn(198)=-0.3610011570E-06

mn(199)=1.160119306E-006  
mn(200)=8.23396094E-007  
mn(201)=5.110984171E-007  
mn(202)=-0.6156611359E-05  
mn(203)=6.224635636E-006  
mn(204)=1.897806813E-007  
mn(205)=-0.3036211723E-06  
mn(206)=3.011880417E-007  
mn(207)=3.261762821E-006  
mn(208)=-0.9264942739E-05  
mn(209)=8.868951069E-006  
mn(210)=-0.1065054013E-05  
mn(211)=-0.8473766156E-06  
mn(212)=1.150155764E-006  
mn(213)=-0.2177408122E-06  
mn(214)=3.134353779E-006  
mn(215)=-0.8979854359E-05  
mn(216)=8.461929633E-006  
mn(217)=-0.1021665487E-05  
mn(218)=-0.1317566356E-05  
mn(219)=2.995484704E-006  
mn(220)=-0.1709952767E-05  
mn(221)=5.545309251E-007  
mn(222)=2.125854162E-006  
mn(223)=-0.6481266053E-05  
mn(224)=5.640608911E-006  
mn(225)=9.952886822E-007  
mn(226)=-0.1748468704E-05  
mn(227)=2.701846371E-006  
mn(228)=-0.1575401221E-05  
mn(229)=3.122886446E-007  
mn(230)=2.250004897E-006  
mn(231)=-0.7427713728E-05  
mn(232)=9.293522365E-006  
mn(233)=-0.8782556495E-05  
mn(234)=1.767860055E-005  
mn(235)=-0.1724386760E-04  
mn(236)=7.874787961E-007  
mn(237)=1.087440861E-005  
mn(238)=-0.1838195127E-05  
mn(239)=-0.6850361185E-05  
mn(240)=6.354277015E-006  
mn(241)=-0.2677163186E-05  
mn(242)=1.102921471E-006  
mn(243)=-0.4956912182E-05  
mn(244)=1.547213116E-005  
mn(245)=-0.1966874760E-04  
mn(246)=2.007226097E-005  
mn(247)=-0.2469556866E-04  
mn(248)=2.122942164E-005  
mn(249)=-0.9614708173E-05  
mn(250)=1.398569444E-005  
mn(251)=-0.1325532962E-04  
mn(252)=-0.5950502285E-07  
mn(253)=1.024096979E-005  
mn(254)=-0.9572533393E-05  
mn(255)=6.693742982E-006  
mn(256)=-0.2445001490E-05  
mn(257)=-0.1595892729E-06  
mn(258)=-0.1595892729E-06

C

yk(1)=1.934  
yk(2)=1.937  
yk(3)=1.921  
yk(4)=1.895  
yk(5)=1.871  
yk(6)=1.858  
yk(7)=1.862  
yk(8)=1.885  
yk(9)=1.918  
yk(10)=1.945  
yk(11)=1.956  
yk(12)=1.95  
yk(13)=1.936  
yk(14)=1.925  
yk(15)=1.915  
yk(16)=1.893  
yk(17)=1.85

yk(18)=1.795  
yk(19)=1.756  
yk(20)=1.764  
yk(21)=1.836  
yk(22)=1.962  
yk(23)=2.115  
yk(24)=2.274  
yk(25)=2.427  
yk(26)=2.573  
yk(27)=2.71  
yk(28)=2.841  
yk(29)=2.966  
yk(30)=3.087  
yk(31)=3.203  
yk(32)=3.316  
yk(33)=3.426  
yk(34)=3.534  
yk(35)=3.639  
yk(36)=3.742  
yk(37)=3.844  
yk(38)=3.943  
yk(39)=4.042  
yk(40)=4.138  
yk(41)=4.234  
yk(42)=4.328  
yk(43)=4.422  
yk(44)=4.514  
yk(45)=4.605  
yk(46)=4.696  
yk(47)=4.786  
yk(48)=4.875  
yk(49)=4.963  
yk(50)=5.05  
yk(51)=5.137  
yk(52)=5.224  
yk(53)=5.31  
yk(54)=5.395  
yk(55)=5.48  
yk(56)=5.565  
yk(57)=5.649  
yk(58)=5.732  
yk(59)=5.815  
yk(60)=5.898  
yk(61)=5.981  
yk(62)=6.063  
yk(63)=6.145  
yk(64)=6.227  
yk(65)=6.308  
yk(66)=6.389  
yk(67)=6.47  
yk(68)=6.55  
yk(69)=6.63  
yk(70)=6.711  
yk(71)=6.79  
yk(72)=6.87  
yk(73)=6.949  
yk(74)=7.029  
yk(75)=7.108  
yk(76)=7.186  
yk(77)=7.265  
yk(78)=7.344  
yk(79)=7.422  
yk(80)=7.5  
yk(81)=7.578  
yk(82)=7.656  
yk(83)=7.734  
yk(84)=7.811  
yk(85)=7.889  
yk(86)=7.966  
yk(87)=8.043  
yk(88)=8.121  
yk(89)=8.198  
yk(90)=8.274  
yk(91)=8.351  
yk(92)=8.428  
yk(93)=8.504  
yk(94)=8.581  
yk(95)=8.657  
yk(96)=8.733



yk(97)=8.809  
yk(98)=8.885  
yk(99)=8.961  
yk(100)=9.037  
yk(101)=9.113  
yk(102)=9.189  
yk(103)=9.262  
yk(104)=9.336  
yk(105)=9.41  
yk(106)=9.483  
yk(107)=10.08  
yk(108)=10.15  
yk(109)=10.23  
yk(110)=10.3  
yk(111)=10.37  
yk(112)=10.44  
yk(113)=10.51  
yk(114)=10.59  
yk(115)=10.66  
yk(116)=10.73  
yk(117)=10.8  
yk(118)=10.87  
yk(119)=10.94  
yk(120)=11.02  
yk(121)=11.09  
yk(122)=11.16  
yk(123)=11.23  
yk(124)=11.3  
yk(125)=11.37  
yk(126)=11.44  
yk(127)=11.51  
yk(128)=11.58  
yk(129)=11.66  
yk(130)=11.73  
yk(131)=11.8  
yk(132)=11.87  
yk(133)=11.94  
yk(134)=12.01  
yk(135)=12.08  
yk(136)=12.15  
yk(137)=12.22  
yk(138)=12.29  
yk(139)=12.36  
yk(140)=12.43  
yk(141)=12.5  
yk(142)=12.57  
yk(143)=12.64  
yk(144)=12.71  
yk(145)=12.78  
yk(146)=12.85  
yk(147)=12.92  
yk(148)=12.99  
yk(149)=13.06  
yk(150)=13.13  
yk(151)=13.2  
yk(152)=13.27  
yk(153)=13.34  
yk(154)=13.41  
yk(155)=13.48  
yk(156)=13.55  
yk(157)=13.62  
yk(158)=13.69  
yk(159)=13.75  
yk(160)=13.82  
yk(161)=13.89  
yk(162)=13.96  
yk(163)=14.03  
yk(164)=14.09  
yk(165)=14.15  
yk(166)=14.24  
yk(167)=14.28  
yk(168)=14.38  
yk(169)=14.42  
yk(170)=14.52  
yk(171)=14.56  
yk(172)=14.66  
yk(173)=14.71  
yk(174)=14.8  
yk(175)=14.85

yk(176)=14.95  
yk(177)=15  
yk(178)=15.1  
yk(179)=15.15  
yk(180)=15.2  
yk(181)=15.31  
yk(182)=15.36  
yk(183)=15.46  
yk(184)=15.52  
yk(185)=15.57  
yk(186)=15.68  
yk(187)=15.73  
yk(188)=15.79  
yk(189)=15.84  
yk(190)=15.95  
yk(191)=16.01  
yk(192)=16.07  
yk(193)=16.13  
yk(194)=16.24  
yk(195)=16.3  
yk(196)=16.36  
yk(197)=16.42  
yk(198)=16.54  
yk(199)=16.6  
yk(200)=16.66  
yk(201)=16.72  
yk(202)=16.78  
yk(203)=16.84  
yk(204)=16.91  
yk(205)=17.03  
yk(206)=17.1  
yk(207)=17.16  
yk(208)=17.23  
yk(209)=17.29  
yk(210)=17.36  
yk(211)=17.43  
yk(212)=17.49  
yk(213)=17.56  
yk(214)=17.63  
yk(215)=17.7  
yk(216)=17.77  
yk(217)=17.84  
yk(218)=17.91  
yk(219)=17.98  
yk(220)=18.05  
yk(221)=18.12  
yk(222)=18.19  
yk(223)=18.26  
yk(224)=18.34  
yk(225)=18.41  
yk(226)=18.49  
yk(227)=18.56  
yk(228)=18.64  
yk(229)=18.71  
yk(230)=18.79  
yk(231)=18.87  
yk(232)=18.95  
yk(233)=19.03  
yk(234)=19.1  
yk(235)=19.18  
yk(236)=19.27  
yk(237)=19.35  
yk(238)=19.43  
yk(239)=19.51  
yk(240)=19.6  
yk(241)=19.68  
yk(242)=19.76  
yk(243)=19.85  
yk(244)=19.94  
yk(245)=20.02  
yk(246)=20.11  
yk(247)=20.2  
yk(248)=20.29  
yk(249)=20.38  
yk(250)=20.47  
yk(251)=20.56  
yk(252)=20.65  
yk(253)=20.75  
yk(254)=20.84

yk(255)=20.94  
yk(256)=21.03  
yk(257)=21.13  
yk(258)=21.23

C

mk(1)=-0.2056974797E-03  
mk(2)=-0.2056974797E-03  
mk(3)=-0.1068065588E-03  
mk(4)=2.688397435E-005  
mk(5)=0.0001183978268  
mk(6)=0.0001703125192  
mk(7)=0.000213886397  
mk(8)=0.0001172744509  
mk(9)=-0.7917934408E-04  
mk(10)=-0.1701008492E-03  
mk(11)=-0.1914573904E-03  
mk(12)=-0.8722156273E-04  
mk(13)=6.038513654E-005  
mk(14)=2.832088618E-005  
mk(15)=-0.1230924566E-03  
mk(16)=-0.2418463267E-03  
mk(17)=-0.1676036327E-03  
mk(18)=0.0001676511814  
mk(19)=0.0004789119822  
mk(20)=0.000722128429  
mk(21)=0.0005407566278  
mk(22)=0.0002561071177  
mk(23)=5.128294627E-005  
mk(24)=-0.5852862237E-04  
mk(25)=-0.1062370393E-03  
mk(26)=-0.5809402905E-04  
mk(27)=-0.9587203859E-04  
mk(28)=-0.2927795607E-05  
mk(29)=-0.1187081651E-03  
mk(30)=-0.1380908200E-04  
mk(31)=3.011215267E-005  
mk(32)=-0.1097369471E-03  
mk(33)=4.058991964E-006  
mk(34)=-0.3597852373E-04  
mk(35)=-0.3887003001E-04  
mk(36)=8.135027812E-005  
mk(37)=-0.1060730336E-03  
mk(38)=-0.2741568969E-04  
mk(39)=3.854510182E-005  
mk(40)=-0.4791596583E-04  
mk(41)=-0.1335478074E-04  
mk(42)=4.216835303E-005  
mk(43)=-0.8320096898E-04  
mk(44)=1.740474506E-005  
mk(45)=3.575885323E-005  
mk(46)=-0.6391073138E-04  
mk(47)=1.494621512E-005  
mk(48)=5.342520799E-005  
mk(49)=-0.1642259652E-03  
mk(50)=0.000153261479  
mk(51)=-0.5989278296E-04  
mk(52)=-0.4435751202E-04  
mk(53)=4.905884956E-005  
mk(54)=-0.6075869421E-04  
mk(55)=7.080490163E-005  
mk(56)=-0.5006182511E-04  
mk(57)=-0.5082416871E-04  
mk(58)=7.85017941E-005  
mk(59)=-0.7959787112E-04  
mk(60)=0.0001260874676  
mk(61)=-0.2125139603E-03  
mk(62)=0.000239937889  
mk(63)=-0.1979182266E-03  
mk(64)=0.0001031185805  
mk(65)=-0.4357142927E-04  
mk(66)=-0.3104021235E-04  
mk(67)=6.618865489E-005  
mk(68)=-0.3827516211E-04  
mk(69)=-0.1255056031E-04  
mk(70)=4.887492889E-005  
mk(71)=-0.1031202277E-04  
mk(72)=-0.4127333641E-04  
mk(73)=1.773812258E-005  
mk(74)=-0.6318548379E-04

mk(75)=8.710424826E-005  
mk(76)=-0.2624160969E-04  
mk(77)=-0.1024047049E-04  
mk(78)=-0.2261527568E-04  
mk(79)=-0.4390308411E-04  
mk(80)=0.0001131857357  
mk(81)=-0.5364249211E-04  
mk(82)=1.510185882E-005  
mk(83)=-0.9128112172E-04  
mk(84)=0.0002076084199  
mk(85)=-0.2548356662E-03  
mk(86)=0.000175775122  
mk(87)=-0.4321478085E-04  
mk(88)=-0.2045299000E-04  
mk(89)=-0.1609070508E-04  
mk(90)=-0.5074319542E-04  
mk(91)=0.0001989441456  
mk(92)=-0.2746986030E-03  
mk(93)=0.0002247755234  
mk(94)=-0.1117551322E-03  
mk(95)=2.78139445E-005  
mk(96)=-0.1650973092E-04  
mk(97)=2.255585476E-005  
mk(98)=-0.2901001452E-04  
mk(99)=2.179430865E-005  
mk(100)=-0.1001771327E-04  
mk(101)=8.80581103E-006  
mk(102)=-0.3339589332E-04  
mk(103)=1.557357936E-008  
mk(104)=2.618454061E-005  
mk(105)=-0.4469140921E-04  
mk(106)=2.661110254E-005  
mk(107)=-0.3871237640E-04  
mk(108)=0.0002236356442  
mk(109)=-0.2365730980E-03  
mk(110)=6.226602689E-005  
mk(111)=1.679391785E-006  
mk(112)=-0.5348922556E-04  
mk(113)=0.0002305097825  
mk(114)=-0.2400842347E-03  
mk(115)=6.842699935E-005  
mk(116)=-0.1182175862E-04  
mk(117)=2.240200245E-006  
mk(118)=-0.5174987641E-04  
mk(119)=0.0002304669954  
mk(120)=-0.2385694852E-03  
mk(121)=6.840085604E-005  
mk(122)=-0.4986672689E-05  
mk(123)=-0.1669400647E-04  
mk(124)=1.873465661E-005  
mk(125)=-0.2433643417E-04  
mk(126)=2.657102842E-005  
mk(127)=-0.4614250040E-04  
mk(128)=0.0001980460975  
mk(129)=-0.1975890376E-03  
mk(130)=3.485954556E-005  
mk(131)=6.32749399E-006  
mk(132)=-0.1648188110E-04  
mk(133)=9.663241093E-006  
mk(134)=2.461637308E-005  
mk(135)=-0.5769647750E-04  
mk(136)=5.818428873E-005  
mk(137)=-0.2391347114E-04  
mk(138)=-0.1119725147E-04  
mk(139)=2.022202635E-005  
mk(140)=-0.1403739152E-04  
mk(141)=-0.1165710249E-04  
mk(142)=1.355163327E-005  
mk(143)=1.52492754E-005  
mk(144)=-0.1169590712E-04  
mk(145)=-0.1528974344E-04  
mk(146)=2.642432002E-005  
mk(147)=-0.2495404711E-04  
mk(148)=2.746008004E-005  
mk(149)=-0.1475548351E-04  
mk(150)=-0.1390843013E-04  
mk(151)=2.521323699E-005  
mk(152)=-0.1376991226E-04  
mk(153)=-0.1470449367E-04

mk(154)=2.82899601E-005  
mk(155)=-0.2187864294E-04  
mk(156)=1.533923347E-005  
mk(157)=4.361476917E-005  
mk(158)=-0.2324228631E-03  
mk(159)=0.000246954308  
mk(160)=-0.6895262338E-04  
mk(161)=-0.1305734226E-04  
mk(162)=7.785949066E-005  
mk(163)=-0.3386467637E-03  
mk(164)=0.0007748249087  
mk(165)=-0.4090410153E-03  
mk(166)=-0.1353338039E-03  
mk(167)=0.0004721961759  
mk(168)=-0.4939666099E-03  
mk(169)=0.000469479856  
mk(170)=-0.4648155946E-03  
mk(171)=0.0003573443869  
mk(172)=-0.1699676120E-03  
mk(173)=-0.7975126030E-04  
mk(174)=0.0001329450659  
mk(175)=-0.3595832188E-04  
mk(176)=1.038513955E-005  
mk(177)=-0.5230534190E-04  
mk(178)=4.267573689E-005  
mk(179)=-0.5638982736E-04  
mk(180)=0.0001429472027  
mk(181)=-0.1355180711E-03  
mk(182)=-0.1134252412E-03  
mk(183)=0.0003031247883  
mk(184)=-0.4175554897E-03  
mk(185)=0.0002303931365  
mk(186)=-0.2426309411E-03  
mk(187)=0.0004081644099  
mk(188)=-0.3900467590E-03  
mk(189)=9.016395449E-005  
mk(190)=6.935937211E-005  
mk(191)=-0.3375169639E-04  
mk(192)=2.543160308E-005  
mk(193)=-0.1076663665E-03  
mk(194)=4.762030851E-005  
mk(195)=4.960001629E-005  
mk(196)=-0.2099677794E-04  
mk(197)=-0.3301101301E-05  
mk(198)=-0.7651052891E-05  
mk(199)=-0.2711406005E-05  
mk(200)=-0.1775324660E-04  
mk(201)=3.768255664E-005  
mk(202)=-0.1679410543E-03  
mk(203)=0.0003553848668  
mk(204)=-0.2890638089E-03  
mk(205)=0.0002737233476  
mk(206)=-0.3561114657E-03  
mk(207)=0.0003673192324  
mk(208)=-0.4124951753E-03  
mk(209)=0.0003310844259  
mk(210)=-0.3310944402E-04  
mk(211)=-0.2335613916E-03  
mk(212)=0.0002396543562  
mk(213)=-0.7701317672E-04  
mk(214)=3.338422991E-005  
mk(215)=-0.9185894828E-04  
mk(216)=7.647561007E-005  
mk(217)=-0.2759584847E-04  
mk(218)=3.501512179E-008  
mk(219)=-0.6400008719E-05  
mk(220)=-0.7786476221E-05  
mk(221)=4.509850835E-006  
mk(222)=-0.4272364763E-04  
mk(223)=0.0001336504311  
mk(224)=-0.1848693440E-03  
mk(225)=0.0002447843083  
mk(226)=-0.2707702816E-03  
mk(227)=0.0002577210848  
mk(228)=-0.2537834158E-03  
mk(229)=0.0001952617005  
mk(230)=-0.3808913961E-04  
mk(231)=-0.7523675594E-04  
mk(232)=0.0001057710681

mk(233)=-0.1885282923E-03  
mk(234)=0.0001297305257  
mk(235)=0.0001188394073  
mk(236)=-0.1648188147E-03  
mk(237)=4.317438174E-005  
mk(238)=-0.3904107566E-04  
mk(239)=8.257237207E-005  
mk(240)=-0.8411750069E-04  
mk(241)=-0.1123723625E-04  
mk(242)=9.918423324E-005  
mk(243)=3.335442452E-006  
mk(244)=-0.1433911623E-03  
mk(245)=0.0001346720585  
mk(246)=-0.2687995515E-04  
mk(247)=-0.5700657294E-04  
mk(248)=5.433887629E-005  
mk(249)=-0.2314161276E-04  
mk(250)=8.946712047E-006  
mk(251)=-0.4165567041E-04  
mk(252)=0.0001284365424  
mk(253)=-0.1497577798E-03  
mk(254)=9.574634766E-005  
mk(255)=-0.9787508130E-04  
mk(256)=0.0001057708793  
mk(257)=-0.2690996341E-04  
mk(258)=-0.2690996341E-04

else

c SC Single Crystalline Au sample Splinecoefficinet

c n=Real n

yn(1)=1.562  
yn(2)=1.609  
yn(3)=1.642  
yn(4)=1.656  
yn(5)=1.65  
yn(6)=1.627  
yn(7)=1.595  
yn(8)=1.566  
yn(9)=1.55  
yn(10)=1.549  
yn(11)=1.554  
yn(12)=1.552  
yn(13)=1.533  
yn(14)=1.503  
yn(15)=1.473  
yn(16)=1.444  
yn(17)=1.399  
yn(18)=1.315  
yn(19)=1.179  
yn(20)=1.003  
yn(21)=0.8181  
yn(22)=0.6582  
yn(23)=0.5376  
yn(24)=0.4515  
yn(25)=0.3897  
yn(26)=0.3437  
yn(27)=0.3078  
yn(28)=0.279  
yn(29)=0.2553  
yn(30)=0.2353  
yn(31)=0.2184  
yn(32)=0.204  
yn(33)=0.1916  
yn(34)=0.1809  
yn(35)=0.1717  
yn(36)=0.1638  
yn(37)=0.157  
yn(38)=0.1511  
yn(39)=0.146  
yn(40)=0.1417  
yn(41)=0.138  
yn(42)=0.1348  
yn(43)=0.1322  
yn(44)=0.13  
yn(45)=0.1282  
yn(46)=0.1268  
yn(47)=0.1257  
yn(48)=0.1248  
yn(49)=0.1243

yn(50)=0.1239  
yn(51)=0.1238  
yn(52)=0.1239  
yn(53)=0.1241  
yn(54)=0.1245  
yn(55)=0.1251  
yn(56)=0.1258  
yn(57)=0.1266  
yn(58)=0.1275  
yn(59)=0.1286  
yn(60)=0.1297  
yn(61)=0.1309  
yn(62)=0.1323  
yn(63)=0.1337  
yn(64)=0.1351  
yn(65)=0.1367  
yn(66)=0.1383  
yn(67)=0.14  
yn(68)=0.1417  
yn(69)=0.1435  
yn(70)=0.1453  
yn(71)=0.1472  
yn(72)=0.1491  
yn(73)=0.1511  
yn(74)=0.1531  
yn(75)=0.1552  
yn(76)=0.1573  
yn(77)=0.1594  
yn(78)=0.1616  
yn(79)=0.1638  
yn(80)=0.166  
yn(81)=0.1683  
yn(82)=0.1705  
yn(83)=0.1729  
yn(84)=0.1752  
yn(85)=0.1776  
yn(86)=0.18  
yn(87)=0.1824  
yn(88)=0.1849  
yn(89)=0.1874  
yn(90)=0.1899  
yn(91)=0.1924  
yn(92)=0.1949  
yn(93)=0.1975  
yn(94)=0.2001  
yn(95)=0.2027  
yn(96)=0.2053  
yn(97)=0.2079  
yn(98)=0.2106  
yn(99)=0.2133  
yn(100)=0.216  
yn(101)=0.2187  
yn(102)=0.2214  
yn(103)=0.2241  
yn(104)=0.2269  
yn(105)=0.2297  
yn(106)=0.2325  
yn(107)=0.2553  
yn(108)=0.2582  
yn(109)=0.2611  
yn(110)=0.2644  
yn(111)=0.2678  
yn(112)=0.2712  
yn(113)=0.2747  
yn(114)=0.2782  
yn(115)=0.2818  
yn(116)=0.2854  
yn(117)=0.2891  
yn(118)=0.2928  
yn(119)=0.2965  
yn(120)=0.3003  
yn(121)=0.3042  
yn(122)=0.3081  
yn(123)=0.312  
yn(124)=0.3161  
yn(125)=0.3201  
yn(126)=0.3242  
yn(127)=0.3284  
yn(128)=0.3326

yn(129)=0.3369  
yn(130)=0.3412  
yn(131)=0.3457  
yn(132)=0.3501  
yn(133)=0.3546  
yn(134)=0.3592  
yn(135)=0.3639  
yn(136)=0.3686  
yn(137)=0.3733  
yn(138)=0.3782  
yn(139)=0.3831  
yn(140)=0.3881  
yn(141)=0.3931  
yn(142)=0.3982  
yn(143)=0.4034  
yn(144)=0.4087  
yn(145)=0.414  
yn(146)=0.4194  
yn(147)=0.4249  
yn(148)=0.4305  
yn(149)=0.4361  
yn(150)=0.4418  
yn(151)=0.4476  
yn(152)=0.4535  
yn(153)=0.4595  
yn(154)=0.4655  
yn(155)=0.4717  
yn(156)=0.4779  
yn(157)=0.4842  
yn(158)=0.4906  
yn(159)=0.4971  
yn(160)=0.5037  
yn(161)=0.5104  
yn(162)=0.5172  
yn(163)=0.5241  
yn(164)=0.5294  
yn(165)=0.5345  
yn(166)=0.541  
yn(167)=0.5443  
yn(168)=0.551  
yn(169)=0.5544  
yn(170)=0.5613  
yn(171)=0.5647  
yn(172)=0.5718  
yn(173)=0.5754  
yn(174)=0.5827  
yn(175)=0.5864  
yn(176)=0.5939  
yn(177)=0.5977  
yn(178)=0.6054  
yn(179)=0.6093  
yn(180)=0.6133  
yn(181)=0.6213  
yn(182)=0.6254  
yn(183)=0.6336  
yn(184)=0.6378  
yn(185)=0.6421  
yn(186)=0.6507  
yn(187)=0.655  
yn(188)=0.6594  
yn(189)=0.6639  
yn(190)=0.6729  
yn(191)=0.6775  
yn(192)=0.6822  
yn(193)=0.6869  
yn(194)=0.6964  
yn(195)=0.7012  
yn(196)=0.7061  
yn(197)=0.711  
yn(198)=0.7211  
yn(199)=0.7262  
yn(200)=0.7313  
yn(201)=0.7365  
yn(202)=0.7418  
yn(203)=0.7471  
yn(204)=0.7525  
yn(205)=0.7634  
yn(206)=0.7689  
yn(207)=0.7745



yn(208)=0.7802  
yn(209)=0.786  
yn(210)=0.7918  
yn(211)=0.7976  
yn(212)=0.8036  
yn(213)=0.8096  
yn(214)=0.8156  
yn(215)=0.8218  
yn(216)=0.828  
yn(217)=0.8342  
yn(218)=0.8406  
yn(219)=0.847  
yn(220)=0.8535  
yn(221)=0.86  
yn(222)=0.8667  
yn(223)=0.8734  
yn(224)=0.8802  
yn(225)=0.8871  
yn(226)=0.894  
yn(227)=0.9011  
yn(228)=0.9082  
yn(229)=0.9154  
yn(230)=0.9227  
yn(231)=0.9301  
yn(232)=0.9376  
yn(233)=0.9451  
yn(234)=0.9528  
yn(235)=0.9605  
yn(236)=0.9683  
yn(237)=0.9763  
yn(238)=0.9843  
yn(239)=0.9924  
yn(240)=1.001  
yn(241)=1.009  
yn(242)=1.017  
yn(243)=1.026  
yn(244)=1.035  
yn(245)=1.043  
yn(246)=1.052  
yn(247)=1.061  
yn(248)=1.07  
yn(249)=1.08  
yn(250)=1.089  
yn(251)=1.098  
yn(252)=1.108  
yn(253)=1.118  
yn(254)=1.128  
yn(255)=1.138  
yn(256)=1.148  
yn(257)=1.158  
yn(258)=1.168

c

mn(1)=-0.1245561126E-03  
mn(2)=-0.1245561126E-03  
mn(3)=-0.2012568965E-03  
mn(4)=-0.2086908594E-03  
mn(5)=-0.1732610296E-03  
mn(6)=-0.1049726901E-03  
mn(7)=3.716833379E-005  
mn(8)=0.0001424316554  
mn(9)=0.0001738580517  
mn(10)=6.387356337E-005  
mn(11)=-0.6859806460E-04  
mn(12)=-0.2093654918E-03  
mn(13)=-0.1120377185E-03  
mn(14)=7.95959396E-006  
mn(15)=5.737959546E-005  
mn(16)=-0.1511173547E-03  
mn(17)=-0.4153923482E-03  
mn(18)=-0.5691245305E-03  
mn(19)=-0.3998182133E-03  
mn(20)=-0.1732426697E-03  
mn(21)=0.0003705188885  
mn(22)=0.00039697138  
mn(23)=0.0003506137853  
mn(24)=0.0002274908354  
mn(25)=0.0001715019514  
mn(26)=8.020038773E-005  
mn(27)=8.264325156E-005

mn(28)=3.649838617E-005  
mn(29)=5.183298811E-005  
mn(30)=2.181534156E-005  
mn(31)=1.963400408E-005  
mn(32)=2.875700484E-005  
mn(33)=1.447066802E-005  
mn(34)=1.51095061E-005  
mn(35)=1.379696645E-005  
mn(36)=5.865069427E-006  
mn(37)=1.293621391E-005  
mn(38)=9.913243222E-006  
mn(39)=4.011450864E-006  
mn(40)=9.04153167E-006  
mn(41)=2.923914511E-006  
mn(42)=6.670597012E-006  
mn(43)=4.452439979E-006  
mn(44)=3.379751789E-006  
mn(45)=3.794329437E-006  
mn(46)=4.036785639E-006  
mn(47)=1.69392801E-007  
mn(48)=6.062427409E-006  
mn(49)=-0.4585804443E-006  
mn(50)=3.782796168E-006  
mn(51)=2.122178375E-006  
mn(52)=2.514431197E-007  
mn(53)=2.58461856E-006  
mn(54)=1.900263696E-006  
mn(55)=1.110794106E-006  
mn(56)=1.016002781E-006  
mn(57)=-0.1110017853E-006  
mn(58)=4.06069729E-006  
mn(59)=-0.2109946649E-05  
mn(60)=2.891307593E-006  
mn(61)=-0.3103421283E-06  
mn(62)=3.419512263E-006  
mn(63)=-0.4220785397E-05  
mn(64)=5.600058803E-006  
mn(65)=-0.2227528568E-05  
mn(66)=1.308567299E-006  
mn(67)=6.924733636E-007  
mn(68)=1.311887598E-006  
mn(69)=-0.1946027768E-05  
mn(70)=4.254207103E-006  
mn(71)=-0.2087087851E-05  
mn(72)=1.761883482E-006  
mn(73)=-0.1155178119E-05  
mn(74)=5.31829998E-007  
mn(75)=2.360817671E-006  
mn(76)=-0.1552544322E-05  
mn(77)=1.403638175E-006  
mn(78)=-0.4714864649E-06  
mn(79)=-0.1916647019E-05  
mn(80)=5.716862821E-006  
mn(81)=-0.4872569539E-05  
mn(82)=4.969801675E-006  
mn(83)=-0.5353010929E-05  
mn(84)=8.064836021E-006  
mn(85)=-0.7727012389E-05  
mn(86)=5.147519974E-006  
mn(87)=-0.1971880920E-06  
mn(88)=-0.6137218928E-06  
mn(89)=6.737655991E-008  
mn(90)=-0.2159772240E-05  
mn(91)=6.066784999E-006  
mn(92)=-0.6698422523E-05  
mn(93)=6.240665985E-006  
mn(94)=-0.2893421642E-05  
mn(95)=8.199605866E-007  
mn(96)=-0.9658626330E-06  
mn(97)=2.504224748E-006  
mn(98)=-0.1476178525E-05  
mn(99)=8.663161872E-007  
mn(100)=-0.2757184830E-06  
mn(101)=-0.9937820269E-07  
mn(102)=3.809138601E-007  
mn(103)=6.302161968E-007  
mn(104)=6.177404837E-007  
mn(105)=-0.8269604926E-06  
mn(106)=1.838722039E-007

mn(107)=1.953304203E-007  
mn(108)=-0.1314023050E-05  
mn(109)=5.593663053E-006  
mn(110)=3.420028262E-007  
mn(111)=-0.3802321191E-06  
mn(112)=1.945082501E-006  
mn(113)=-0.5034963908E-06  
mn(114)=1.061914818E-006  
mn(115)=-0.5658039066E-06  
mn(116)=2.295890398E-006  
mn(117)=-0.1353052415E-05  
mn(118)=2.294584904E-007  
mn(119)=1.767192934E-006  
mn(120)=2.059537394E-007  
mn(121)=4.469433179E-007  
mn(122)=-0.3673122810E-06  
mn(123)=2.818782999E-006  
mn(124)=-0.1897982404E-05  
mn(125)=7.442075011E-007  
mn(126)=1.847841678E-006  
mn(127)=-0.7544378103E-07  
mn(128)=8.041819273E-007  
mn(129)=-0.2313260706E-06  
mn(130)=2.681357973E-006  
mn(131)=-0.1669101473E-05  
mn(132)=7.906170673E-007  
mn(133)=1.295970625E-006  
mn(134)=3.039897132E-006  
mn(135)=-0.3995633004E-05  
mn(136)=3.0460976E-006  
mn(137)=2.025860059E-006  
mn(138)=-0.2231455894E-05  
mn(139)=3.515536593E-006  
mn(140)=-0.1893974097E-05  
mn(141)=6.647143614E-007  
mn(142)=1.700775702E-006  
mn(143)=2.673521752E-006  
mn(144)=-0.1630506933E-05  
mn(145)=3.035713364E-007  
mn(146)=2.810269876E-006  
mn(147)=-0.4704328427E-06  
mn(148)=1.444382724E-006  
mn(149)=3.030136079E-007  
mn(150)=-0.2593088346E-06  
mn(151)=2.973159615E-006  
mn(152)=4.745381979E-007  
mn(153)=-0.2620766273E-05  
mn(154)=6.20024768E-006  
mn(155)=-0.3617900137E-05  
mn(156)=4.387847274E-006  
mn(157)=-0.4930832898E-06  
mn(158)=-0.2698844084E-06  
mn(159)=3.548302401E-006  
mn(160)=2.532251367E-007  
mn(161)=-0.2533038688E-05  
mn(162)=1.169675679E-005  
mn(163)=-0.4229311773E-04  
mn(164)=7.109217955E-005  
mn(165)=-0.5917844237E-04  
mn(166)=1.528557243E-005  
mn(167)=2.113164455E-006  
mn(168)=-0.5251909602E-06  
mn(169)=1.667892348E-006  
mn(170)=-0.3440146113E-05  
mn(171)=5.485588319E-006  
mn(172)=-0.6532299769E-05  
mn(173)=6.005809968E-006  
mn(174)=-0.1735594453E-05  
mn(175)=3.769913715E-007  
mn(176)=6.307864669E-007  
mn(177)=-0.2820630331E-05  
mn(178)=2.831958311E-006  
mn(179)=2.020014881E-006  
mn(180)=-0.1982616624E-05  
mn(181)=2.590724496E-006  
mn(182)=-0.4616440967E-05  
mn(183)=4.361113175E-006  
mn(184)=1.044879778E-006  
mn(185)=-0.6978464396E-06

mn(186)=-0.7717524888E-06  
mn(187)=1.377384647E-006  
mn(188)=2.552012673E-006  
mn(189)=-0.4444099871E-05  
mn(190)=4.035500645E-006  
mn(191)=1.037337116E-006  
mn(192)=-0.1607164126E-05  
mn(193)=2.257709291E-006  
mn(194)=-0.5938416448E-05  
mn(195)=9.120221636E-006  
mn(196)=-0.3604777080E-05  
mn(197)=2.230133555E-006  
mn(198)=-0.6767697440E-06  
mn(199)=-0.7632395082E-06  
mn(200)=6.406535801E-007  
mn(201)=3.387399765E-006  
mn(202)=-0.9098115769E-05  
mn(203)=9.044961048E-006  
mn(204)=-0.1753262229E-05  
mn(205)=3.900952182E-007  
mn(206)=3.474521734E-007  
mn(207)=2.609460355E-006  
mn(208)=-0.6493106182E-05  
mn(209)=6.784664862E-006  
mn(210)=-0.3429290194E-05  
mn(211)=3.874486809E-006  
mn(212)=-0.1310150847E-05  
mn(213)=-0.1716342439E-05  
mn(214)=5.082704026E-006  
mn(215)=-0.8436910855E-05  
mn(216)=5.938629742E-006  
mn(217)=1.283718812E-006  
mn(218)=-0.1490539180E-05  
mn(219)=1.589383751E-006  
mn(220)=-0.1819922668E-05  
mn(221)=2.622593725E-006  
mn(222)=1.138230663E-007  
mn(223)=-0.6127826509E-05  
mn(224)=7.73851902E-006  
mn(225)=-0.3525366195E-05  
mn(226)=3.317356911E-006  
mn(227)=-0.1868776662E-05  
mn(228)=1.089536181E-006  
mn(229)=-0.2546114578E-06  
mn(230)=2.075693316E-006  
mn(231)=-0.5962883145E-05  
mn(232)=5.157775461E-006  
mn(233)=6.370254464E-007  
mn(234)=-0.9733084086E-06  
mn(235)=1.967705243E-007  
mn(236)=1.855634162E-006  
mn(237)=-0.1383811813E-05  
mn(238)=6.212574018E-007  
mn(239)=3.40426093E-007  
mn(240)=-0.1931148351E-05  
mn(241)=-0.2854066021E-05  
mn(242)=1.038482945E-005  
mn(243)=1.914624707E-007  
mn(244)=-0.1423563482E-04  
mn(245)=1.319591991E-005  
mn(246)=-0.1710125306E-05  
mn(247)=-0.9326241537E-05  
mn(248)=1.859140527E-005  
mn(249)=-0.1486778801E-04  
mn(250)=7.450749045E-007  
mn(251)=8.872967398E-006  
mn(252)=-0.3440007895E-05  
mn(253)=1.771570592E-006  
mn(254)=-0.6736671156E-05  
mn(255)=5.549128839E-006  
mn(256)=-0.2082301635E-05  
mn(257)=-0.1730124334E-06  
mn(258)=-0.1730124334E-06

c  
c

k=Imag n  
yk(1)=1.827  
yk(2)=1.836  
yk(3)=1.825  
yk(4)=1.804

yk(5)=1.784  
yk(6)=1.773  
yk(7)=1.778  
yk(8)=1.8  
yk(9)=1.832  
yk(10)=1.858  
yk(11)=1.869  
yk(12)=1.863  
yk(13)=1.85  
yk(14)=1.841  
yk(15)=1.834  
yk(16)=1.815  
yk(17)=1.774  
yk(18)=1.719  
yk(19)=1.677  
yk(20)=1.68  
yk(21)=1.745  
yk(22)=1.863  
yk(23)=2.007  
yk(24)=2.155  
yk(25)=2.298  
yk(26)=2.434  
yk(27)=2.563  
yk(28)=2.685  
yk(29)=2.803  
yk(30)=2.916  
yk(31)=3.026  
yk(32)=3.133  
yk(33)=3.237  
yk(34)=3.338  
yk(35)=3.438  
yk(36)=3.536  
yk(37)=3.632  
yk(38)=3.726  
yk(39)=3.819  
yk(40)=3.911  
yk(41)=4.002  
yk(42)=4.091  
yk(43)=4.18  
yk(44)=4.268  
yk(45)=4.354  
yk(46)=4.44  
yk(47)=4.525  
yk(48)=4.61  
yk(49)=4.694  
yk(50)=4.777  
yk(51)=4.859  
yk(52)=4.941  
yk(53)=5.023  
yk(54)=5.104  
yk(55)=5.185  
yk(56)=5.265  
yk(57)=5.345  
yk(58)=5.424  
yk(59)=5.503  
yk(60)=5.582  
yk(61)=5.66  
yk(62)=5.738  
yk(63)=5.816  
yk(64)=5.893  
yk(65)=5.97  
yk(66)=6.047  
yk(67)=6.124  
yk(68)=6.2  
yk(69)=6.276  
yk(70)=6.352  
yk(71)=6.428  
yk(72)=6.504  
yk(73)=6.579  
yk(74)=6.654  
yk(75)=6.729  
yk(76)=6.804  
yk(77)=6.878  
yk(78)=6.953  
yk(79)=7.027  
yk(80)=7.101  
yk(81)=7.175  
yk(82)=7.249  
yk(83)=7.323

yk(84)=7.396  
yk(85)=7.47  
yk(86)=7.543  
yk(87)=7.616  
yk(88)=7.689  
yk(89)=7.762  
yk(90)=7.835  
yk(91)=7.908  
yk(92)=7.981  
yk(93)=8.053  
yk(94)=8.126  
yk(95)=8.198  
yk(96)=8.27  
yk(97)=8.342  
yk(98)=8.414  
yk(99)=8.486  
yk(100)=8.558  
yk(101)=8.63  
yk(102)=8.702  
yk(103)=8.773  
yk(104)=8.845  
yk(105)=8.916  
yk(106)=8.988  
yk(107)=9.056  
yk(108)=9.127  
yk(109)=9.198  
yk(110)=9.262  
yk(111)=9.325  
yk(112)=9.389  
yk(113)=9.452  
yk(114)=10.01  
yk(115)=10.08  
yk(116)=10.14  
yk(117)=10.2  
yk(118)=10.27  
yk(119)=10.33  
yk(120)=10.39  
yk(121)=10.45  
yk(122)=10.51  
yk(123)=10.57  
yk(124)=10.64  
yk(125)=10.7  
yk(126)=10.76  
yk(127)=10.82  
yk(128)=10.88  
yk(129)=10.94  
yk(130)=11  
yk(131)=11.06  
yk(132)=11.12  
yk(133)=11.18  
yk(134)=11.24  
yk(135)=11.3  
yk(136)=11.36  
yk(137)=11.42  
yk(138)=11.48  
yk(139)=11.53  
yk(140)=11.59  
yk(141)=11.65  
yk(142)=11.71  
yk(143)=11.77  
yk(144)=11.83  
yk(145)=11.88  
yk(146)=11.94  
yk(147)=12  
yk(148)=12.06  
yk(149)=12.11  
yk(150)=12.17  
yk(151)=12.23  
yk(152)=12.29  
yk(153)=12.34  
yk(154)=12.4  
yk(155)=12.46  
yk(156)=12.51  
yk(157)=12.57  
yk(158)=12.62  
yk(159)=12.68  
yk(160)=12.74  
yk(161)=12.79  
yk(162)=12.85

yk(163)=12.9  
yk(164)=12.95  
yk(165)=13  
yk(166)=13.08  
yk(167)=13.13  
yk(168)=13.21  
yk(169)=13.25  
yk(170)=13.34  
yk(171)=13.38  
yk(172)=13.47  
yk(173)=13.51  
yk(174)=13.6  
yk(175)=13.64  
yk(176)=13.73  
yk(177)=13.78  
yk(178)=13.87  
yk(179)=13.92  
yk(180)=13.96  
yk(181)=14.06  
yk(182)=14.1  
yk(183)=14.2  
yk(184)=14.25  
yk(185)=14.3  
yk(186)=14.4  
yk(187)=14.45  
yk(188)=14.5  
yk(189)=14.55  
yk(190)=14.65  
yk(191)=14.7  
yk(192)=14.75  
yk(193)=14.8  
yk(194)=14.91  
yk(195)=14.96  
yk(196)=15.02  
yk(197)=15.07  
yk(198)=15.18  
yk(199)=15.24  
yk(200)=15.29  
yk(201)=15.35  
yk(202)=15.4  
yk(203)=15.46  
yk(204)=15.52  
yk(205)=15.63  
yk(206)=15.69  
yk(207)=15.75  
yk(208)=15.81  
yk(209)=15.87  
yk(210)=15.93  
yk(211)=15.99  
yk(212)=16.05  
yk(213)=16.11  
yk(214)=16.17  
yk(215)=16.24  
yk(216)=16.3  
yk(217)=16.36  
yk(218)=16.43  
yk(219)=16.49  
yk(220)=16.56  
yk(221)=16.62  
yk(222)=16.69  
yk(223)=16.75  
yk(224)=16.82  
yk(225)=16.89  
yk(226)=16.96  
yk(227)=17.03  
yk(228)=17.09  
yk(229)=17.16  
yk(230)=17.23  
yk(231)=17.3  
yk(232)=17.38  
yk(233)=17.45  
yk(234)=17.52  
yk(235)=17.59  
yk(236)=17.67  
yk(237)=17.74  
yk(238)=17.82  
yk(239)=17.89  
yk(240)=17.97  
yk(241)=18.04

yk(242)=18.12  
yk(243)=18.2  
yk(244)=18.28  
yk(245)=18.36  
yk(246)=18.44  
yk(247)=18.52  
yk(248)=18.6  
yk(249)=18.68  
yk(250)=18.76  
yk(251)=18.85  
yk(252)=18.93  
yk(253)=19.02  
yk(254)=19.1  
yk(255)=19.19  
yk(256)=19.27  
yk(257)=19.36  
yk(258)=19.45

c

mk(1)=-0.2184725378E-03  
mk(2)=-0.2184725378E-03  
mk(3)=-0.1009746558E-03  
mk(4)=1.745580891E-005  
mk(5)=9.013217706E-005  
mk(6)=0.0001708878976  
mk(7)=0.0001811027744  
mk(8)=0.0001272354121  
mk(9)=-0.8629999345E-04  
mk(10)=-0.1512370398E-03  
mk(11)=-0.1999760698E-03  
mk(12)=-0.7199018306E-04  
mk(13)=6.786485065E-005  
mk(14)=4.239827116E-005  
mk(15)=-0.1247740365E-03  
mk(16)=-0.2515828531E-03  
mk(17)=-0.1859123197E-03  
mk(18)=0.0001305039993  
mk(19)=0.0004654615829  
mk(20)=0.0006949400228  
mk(21)=0.000535880421  
mk(22)=0.0002512260722  
mk(23)=1.532711276E-005  
mk(24)=-0.3195247352E-04  
mk(25)=-0.1210770415E-03  
mk(26)=-0.1730528312E-04  
mk(27)=-0.1310171955E-03  
mk(28)=4.201119387E-005  
mk(29)=-0.1507348555E-03  
mk(30)=2.536350854E-005  
mk(31)=1.439024925E-005  
mk(32)=-0.9593952551E-04  
mk(33)=-0.2329699757E-04  
mk(34)=1.137385227E-006  
mk(35)=-0.4181745294E-04  
mk(36)=5.559796599E-005  
mk(37)=-0.7399659220E-04  
mk(38)=-0.5768552671E-04  
mk(39)=7.871886153E-005  
mk(40)=-0.7287336315E-04  
mk(41)=-0.5588204713E-05  
mk(42)=3.306056447E-005  
mk(43)=-0.5828671159E-04  
mk(44)=-0.5901823112E-05  
mk(45)=4.118325351E-005  
mk(46)=-0.6747119137E-04  
mk(47)=3.162579566E-005  
mk(48)=4.459903188E-005  
mk(49)=-0.1514763427E-03  
mk(50)=0.0001293496349  
mk(51)=-0.5661381330E-04  
mk(52)=-0.2642564237E-04  
mk(53)=4.023087914E-005  
mk(54)=-0.5055937273E-04  
mk(55)=4.482617587E-005  
mk(56)=-0.2580115079E-04  
mk(57)=-0.5454037546E-04  
mk(58)=7.494068938E-005  
mk(59)=-0.7026625383E-04  
mk(60)=9.805835428E-005  
mk(61)=-0.1822182243E-03



mk(62)=0.0002276274668  
mk(63)=-0.2079764961E-03  
mk(64)=0.0001180701164  
mk(65)=-0.4692161956E-04  
mk(66)=-0.2735382143E-04  
mk(67)=5.978241831E-005  
mk(68)=-0.2886741570E-04  
mk(69)=-0.3856270031E-04  
mk(70)=8.952860388E-005  
mk(71)=-0.3872764839E-04  
mk(72)=-0.2773837181E-04  
mk(73)=-0.3240625925E-05  
mk(74)=-0.4682839908E-04  
mk(75)=0.0001043358955  
mk(76)=-0.6790318180E-04  
mk(77)=1.825016957E-005  
mk(78)=-0.2968524077E-04  
mk(79)=-0.3946653633E-04  
mk(80)=0.0001067973708  
mk(81)=-0.5082207956E-04  
mk(82)=1.462548411E-005  
mk(83)=-0.8785005922E-04  
mk(84)=0.0001986725731  
mk(85)=-0.2443364409E-03  
mk(86)=0.0001721776797  
mk(87)=-0.6112958120E-04  
mk(88)=-0.3524929943E-05  
mk(89)=-0.6914745129E-06  
mk(90)=-0.6667146362E-04  
mk(91)=0.000194064391  
mk(92)=-0.2628679965E-03  
mk(93)=0.0002147593076  
mk(94)=-0.1072421937E-03  
mk(95)=2.671339631E-005  
mk(96)=-0.1572761982E-04  
mk(97)=2.135330274E-005  
mk(98)=-0.2733358525E-04  
mk(99)=2.006873707E-005  
mk(100)=-0.7315279057E-05  
mk(101)=2.279410522E-007  
mk(102)=-0.1381154859E-05  
mk(103)=-0.8485344029E-06  
mk(104)=-0.1107589334E-06  
mk(105)=-0.5554785554E-06  
mk(106)=-0.1643503994E-05  
mk(107)=-0.3638884690E-06  
mk(108)=3.646326051E-005  
mk(109)=-0.1328374414E-03  
mk(110)=1.954190362E-005  
mk(111)=8.078567103E-006  
mk(112)=2.214381249E-005  
mk(113)=-0.1410858014E-03  
mk(114)=0.0002561579763  
mk(115)=-0.2115479561E-03  
mk(116)=1.169992928E-005  
mk(117)=0.0001860548754  
mk(118)=-0.2061448555E-03  
mk(119)=6.632145529E-005  
mk(120)=-0.3492763313E-04  
mk(121)=2.752903188E-005  
mk(122)=-0.5018932075E-04  
mk(123)=0.000201387471  
mk(124)=-0.2024121914E-03  
mk(125)=4.07096111E-005  
mk(126)=-0.6213046265E-05  
mk(127)=1.480154733E-005  
mk(128)=-0.1941022025E-04  
mk(129)=1.882109066E-005  
mk(130)=-0.2028348040E-04  
mk(131)=1.894512592E-005  
mk(132)=-0.1780677743E-04  
mk(133)=9.552070267E-006  
mk(134)=1.971480014E-005  
mk(135)=-0.4516569525E-04  
mk(136)=3.435260853E-005  
mk(137)=3.827277087E-005  
mk(138)=-0.2279975229E-03  
mk(139)=0.0002359730529  
mk(140)=-0.7134831561E-04

mk(141)=9.762602466E-006  
mk(142)=-0.8310592001E-05  
mk(143)=7.330437885E-005  
mk(144)=-0.2325381260E-03  
mk(145)=0.0002107370061  
mk(146)=-0.5260881132E-04  
mk(147)=5.464398353E-005  
mk(148)=-0.2045028466E-03  
mk(149)=0.0002156634871  
mk(150)=-0.8708167100E-04  
mk(151)=9.477879859E-005  
mk(152)=-0.2305662506E-03  
mk(153)=0.0001890601274  
mk(154)=2.836059556E-005  
mk(155)=-0.2407659185E-03  
mk(156)=0.000299378404  
mk(157)=-0.2876279655E-03  
mk(158)=0.0002067370639  
mk(159)=2.304922047E-005  
mk(160)=-0.2289332745E-03  
mk(161)=0.0002471709519  
mk(162)=-0.1952186896E-03  
mk(163)=-0.8363428677E-04  
mk(164)=0.0006025169935  
mk(165)=-0.4270598614E-03  
mk(166)=0.0003665920567  
mk(167)=-0.2758913618E-03  
mk(168)=5.227445494E-005  
mk(169)=0.0001796300758  
mk(170)=-0.2294777649E-03  
mk(171)=0.0002434994648  
mk(172)=-0.2935776163E-03  
mk(173)=0.0002703563238  
mk(174)=-0.2265061466E-03  
mk(175)=0.0001019952717  
mk(176)=0.000103684503  
mk(177)=-0.2448010275E-03  
mk(178)=0.0002748521575  
mk(179)=-0.4767323190E-03  
mk(180)=0.0003917978795  
mk(181)=-0.3724579994E-03  
mk(182)=0.0002369276749  
mk(183)=-0.6676965816E-04  
mk(184)=9.718158396E-006  
mk(185)=-0.9210702721E-05  
mk(186)=-0.4492788871E-05  
mk(187)=-0.8518499809E-05  
mk(188)=3.098439266E-006  
mk(189)=-0.3885215752E-04  
mk(190)=2.581202969E-005  
mk(191)=-0.2889695366E-05  
mk(192)=-0.4763846950E-04  
mk(193)=0.0001595863175  
mk(194)=-0.2458283724E-03  
mk(195)=0.000416801228  
mk(196)=-0.3587257086E-03  
mk(197)=9.477398324E-005  
mk(198)=8.707481517E-005  
mk(199)=-0.3333149163E-03  
mk(200)=0.000371584864  
mk(201)=-0.3575582205E-03  
mk(202)=0.0002103005432  
mk(203)=2.250781923E-005  
mk(204)=-0.1095159532E-03  
mk(205)=9.828610219E-005  
mk(206)=-0.3847922307E-04  
mk(207)=2.268860268E-005  
mk(208)=-0.8495666013E-04  
mk(209)=7.210329775E-005  
mk(210)=-0.2473547495E-04  
mk(211)=-0.4620578240E-05  
mk(212)=1.168938078E-005  
mk(213)=-0.7291458205E-04  
mk(214)=0.0002483833527  
mk(215)=-0.2908480887E-03  
mk(216)=6.344881669E-005  
mk(217)=0.0002064579096  
mk(218)=-0.2881794984E-03  
mk(219)=0.000292800329

mk(220)=-0.3017963686E-03  
 mk(221)=0.0002811063902  
 mk(222)=-0.2597568199E-03  
 mk(223)=0.0001444815459  
 mk(224)=9.067872248E-006  
 mk(225)=-0.2214577019E-04  
 mk(226)=4.828257986E-005  
 mk(227)=-0.2009741102E-03  
 mk(228)=0.0001879765492  
 mk(229)=-0.4908984277E-04  
 mk(230)=-0.2038473680E-04  
 mk(231)=0.0001007653021  
 mk(232)=-0.1148190884E-03  
 mk(233)=3.707988179E-005  
 mk(234)=-0.6189515432E-04  
 mk(235)=0.0001820710515  
 mk(236)=-0.2227488097E-03  
 mk(237)=0.0002150869394  
 mk(238)=-0.2094660488E-03  
 mk(239)=0.000145411185  
 mk(240)=-0.1432291149E-03  
 mk(241)=0.0001468414227  
 mk(242)=-0.4518427879E-04  
 mk(243)=5.769432629E-006  
 mk(244)=-0.6422902007E-05  
 mk(245)=-0.8016803387E-05  
 mk(246)=1.077815432E-005  
 mk(247)=-0.6213939901E-04  
 mk(248)=6.018391543E-005  
 mk(249)=-0.5716523743E-04  
 mk(250)=0.0001419106992  
 mk(251)=-0.1729332579E-03  
 mk(252)=0.0001645241643  
 mk(253)=-0.1602238964E-03  
 mk(254)=0.0001047501143  
 mk(255)=-0.1040425212E-03  
 mk(256)=0.0001080151449  
 mk(257)=-0.2676916600E-04  
 mk(258)=-0.2676916600E-04

c

end if

J=2  
 10 IF (XX.LE.XN(J)) GO TO 20  
 J=J+1  
 GO TO 10  
 20 I=J  
 XN0=XN(I)-XX  
 XN1=XX-XN(I-1)  
 H=XN(I)-XN(I-1)  
 H2=H\*H/6.0  
 refre=MN(I-1)\*XN0\*XN0\*XN0/6./H+MN(I)\*XN1\*XN1\*XN1/6./H+  
 (YN(I-1)-MN(I-1)\*H2)\*XN0/H+(YN(I)-MN(I)\*H2)\*XN1/H  
 J=2  
 30 IF (XX.LE.XK(J)) GO TO 40  
 J=J+1  
 GO TO 30  
 40 I=J  
 XN0=XK(I)-XX  
 XN1=XX-XK(I-1)  
 H=XK(I)-XK(I-1)  
 H2=H\*H/6.0  
 refim=MK(I-1)\*XN0\*XN0\*XN0/6./H+MK(I)\*XN1\*XN1\*XN1/6./H+  
 (YK(I-1)-MK(I-1)\*H2)\*XN0/H+(YK(I)-MK(I)\*H2)\*XN1/H  
  
 eps1b=refre\*refre-refim\*refim  
 eps2b=2.d0\*refre\*refim  
 epsb=eps1b+aim\*eps2b  
 c Correction to the size limiting effect  
 c Step1: calculation of the bulk epsb=eps1b+i\*eps2b  
 eps1b=refre\*refre-refim\*refim

```

eps2b=2.d0*refre*refim
epsb=eps1b+aim*eps2b
C-----
c SIZE CORRECTION
c gamma_b=gamma_b*10**(14) 1/s, gam_b=1.05-1.6
c 1.3 - Scaffardi JApplPhys 2014,(1.32) Etchegoin-Le Ru(2006)gam_b=1.3
c gam_b=1.3
c Olmon PRB 2012 gam_b=1.4
c
c gam_b=1.3
c
c Plasma wavelength
c (h/2*pi)*omega_p=9 eV lambda_p=140 nm
c Olmon PRB 2012 (h/2*pi)*omega_p=8.45 eV lambda_p=131 nm
c wp=140.
c
c parameters gamma_b/omega and gamma_a/omega = [gamma_b+A*v_F/Leff]/omega
c a=1 v_F=14.1*10**(14) nm/s Fermi velocity, Leff=Rm effective length
c gamma_b/omega=gam_om=0.53*10**(-4)*gam_b*lambda
c v_F/(Leff*omega)=7.48*10**(-4)*lambda/Leff
c
c if KD=0 Full correction is used
c Deps=(wavel/wp)**2*[ 1.d0/(1.d0+aim*gamb_om)-1.d0/(1.d0+aim*gama_om)]
c if KD=1 approximationm Deps = Deps2*[B+ i] is used
c Deps2=(5.d0/Rm)*(wavel/520.d0)**3.d0
c B=(gama+gamb)/2/omega
c if KD=2, we set B=0
c
c gamb_om=0.53d-04*gam_b*wavel
c
c gama_om=gamb_om+7.48d-04*wavel/Rm
c
c Step 2:
c IF(KD.eq.0) then
C 2.1 Calculation of the FULL coorection term
c
c Deps=1.d0/(1.d0+aim*gamb_om)-1.d0/(1.d0+aim*gama_om)
c
c Deps=(wavel/wp)**2*Deps
c
c go to 60
c end if
c
c Using approximationm for Deps = Deps2*[(gamma_a+gamma_b)/2/omega + i]
c Deps2=(5.d0/Rm)*(wavel/520.d0)**3.d0
c B=(1.06*gam_b+7.48/Rm)*1.d-04*wavel
c if(KD.eq.2) then
c B=0.
c end if
c Deps=Deps2*(B+aim)
c
c 60 continue
c Step 3: Final correction
c eps=epsb+Deps
c ref=cdsqrt(eps)
C-----
RETURN
END

```

### Section S3. Optical constants of bulk silver for 250-1450 nm

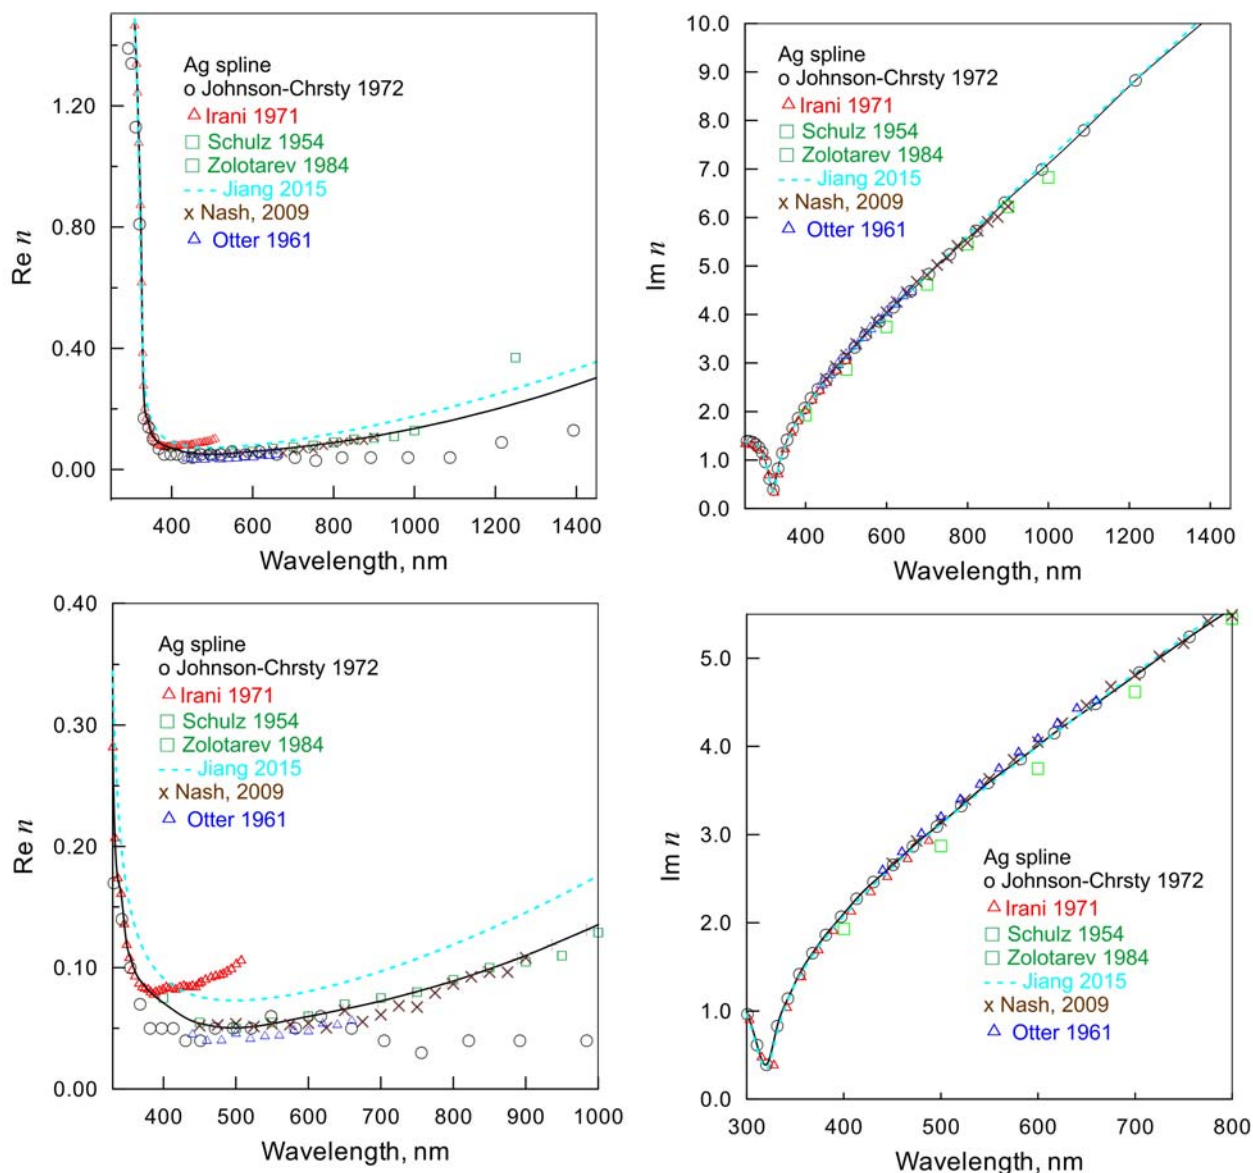

**Figure S2.** Optical constants of bulk silver taken from Refs.[10, 16-22]. The solid black line shows the average spline used in this work (see FORTAN subroutine below).

#### FORTAN subroutine for spline calculating the complex refractive index of bulk silver

```

subroutine Ag2021(wavel, Leff , ref, eps)
IMPLICIT REAL*8(A-H,O-Z)
Real*8 Leff
C      Leff=size/As is the effective scattering length of electrons
REAL*8 MN,MK
DIMENSION XN(100),YN(100),MN(100),XK(100),YK(100),MK(100)
complex*16 ref,eps,im
c      wavel is the wavelength in vacuum
xx=wavel

```

if(xx.gt.600) go to 1

### C spline parameters

XN(1)= 299.5  
XN(2)= 302.9  
XN(3)= 305.2  
XN(4)= 308.6  
XN(5)= 312.8  
XN(6)= 315.3  
XN(7)= 318.7  
XN(8)= 322.7  
XN(9)= 325.7  
XN(10)= 328  
XN(11)= 330  
XN(12)= 333  
XN(13)= 336.8  
XN(14)= 341.5  
XN(15)= 345.9  
XN(16)= 349.4  
XN(17)= 355  
XN(18)= 360  
XN(19)= 370  
XN(20)= 380  
XN(21)= 400  
XN(22)= 420  
XN(23)= 440  
XN(24)= 460  
XN(25)= 480  
XN(26)= 500  
XN(27)= 520  
XN(28)= 540  
XN(29)= 560  
XN(30)= 580  
XN(31)= 600  
XN(32)= 625  
XN(33)= 650  
XN(34)= 675  
XN(35)= 700  
XN(36)= 750  
XN(37)= 800  
XN(38)= 850  
XN(39)= 900  
XN(40)= 950  
XN(41)= 1000  
XN(42)= 1050  
XN(43)= 1100  
XN(44)= 1150  
XN(45)= 1200  
XN(46)= 1250  
XN(47)= 1300  
XN(48)= 1350  
XN(49)= 1400  
XN(50)= 1450  
XN(51)= 1500  
XN(52)= 1550  
XN(53)= 1600

C

YN(1)= 1.564  
YN(2)= 1.556  
YN(3)= 1.543  
YN(4)= 1.47  
YN(5)= 1.343  
YN(6)= 1.248  
YN(7)= 1.083  
YN(8)= 0.877  
YN(9)= 0.622  
YN(10)= 0.389  
YN(11)= 0.282  
YN(12)= 0.207  
YN(13)= 0.174  
YN(14)= 0.161  
YN(15)= 0.136  
YN(16)= 0.119  
YN(17)= 0.107  
YN(18)= 0.098  
YN(19)= 0.088  
YN(20)= 0.081

YN(21)= 0.071  
YN(22)= 0.0625  
YN(23)= 0.056  
YN(24)= 0.0528  
YN(25)= 0.0508  
YN(26)= 0.0505  
YN(27)= 0.0512  
YN(28)= 0.0528  
YN(29)= 0.055  
YN(30)= 0.0575  
YN(31)= 0.0598  
YN(32)= 0.0628  
YN(33)= 0.0659  
YN(34)= 0.0691  
YN(35)= 0.0725  
YN(36)= 0.0804  
YN(37)= 0.089  
YN(38)= 0.099  
YN(39)= 0.11  
YN(40)= 0.1225  
YN(41)= 0.1355  
YN(42)= 0.15  
YN(43)= 0.165  
YN(44)= 0.182  
YN(45)= 0.199  
YN(46)= 0.218  
YN(47)= 0.237  
YN(48)= 0.258  
YN(49)= 0.28  
YN(50)= 0.303  
YN(51)= 0.3265  
YN(52)= 0.352  
YN(53)= 0.378

c

MN(1)= -9.877E-005  
MN(2)= -9.877E-005  
MN(3)= -0.007971  
MN(4)= -0.001121  
MN(5)= -0.002014  
MN(6)= -0.00595  
MN(7)= 0.00355  
MN(8)= -0.01253  
MN(9)= -0.01325  
MN(10)= 0.03488  
MN(11)= 0.008653  
MN(12)= 0.0049  
MN(13)= 0.001394  
MN(14)= -0.001449  
MN(15)= 0.0005294  
MN(16)= 0.0008458  
MN(17)= -0.0001715  
MN(18)= 0.0001913  
MN(19)= -8.268E-006  
MN(20)= 2.173E-005  
MN(21)= -1.057E-006  
MN(22)= 4.999E-006  
MN(23)= 1.106E-005  
MN(24)= 2.58E-007  
MN(25)= 5.907E-006  
MN(26)= 1.613E-006  
MN(27)= 2.642E-006  
MN(28)= 1.318E-006  
MN(29)= 1.087E-006  
MN(30)= -1.166E-006  
MN(31)= 5.777E-007  
MN(32)= 5.315E-008  
MN(33)= 1.697E-007  
MN(34)= 2.281E-007  
MN(35)= 8.379E-007  
MN(36)= 1.233E-008  
MN(37)= 7.928E-007  
MN(38)= 1.765E-007  
MN(39)= 9.014E-007  
MN(40)= -1.82E-007  
MN(41)= 1.027E-006  
MN(42)= -3.245E-007  
MN(43)= 1.471E-006  
MN(44)= -7.612E-007  
MN(45)= 1.573E-006

MN(46)= -7.324E-007  
MN(47)= 1.356E-006  
MN(48)= 1.074E-007  
MN(49)= 6.143E-007  
MN(50)= -1.644E-007  
MN(51)= 1.243E-006  
MN(52)= -8.651E-009  
MN(53)= -8.651E-009

C  
1  
C

continue

XK(1)= 248.9  
XK(2)= 255.2  
XK(3)= 261.6  
XK(4)= 268.9  
XK(5)= 276.1  
XK(6)= 284.4  
XK(7)= 292.5  
XK(8)= 300.9  
XK(9)= 310.7  
XK(10)= 320.4  
XK(11)= 331.5  
XK(12)= 342.5  
XK(13)= 354.3  
XK(14)= 367.9  
XK(15)= 381.5  
XK(16)= 397.4  
XK(17)= 413.3  
XK(18)= 430.5  
XK(19)= 450.9  
XK(20)= 471.4  
XK(21)= 496  
XK(22)= 521  
XK(23)= 548.6  
XK(24)= 582.1  
XK(25)= 616.9  
XK(26)= 659.5  
XK(27)= 704.5  
XK(28)= 756.1  
XK(29)= 821.2  
XK(30)= 892  
XK(31)= 984.1  
XK(32)= 1087.7  
XK(33)= 1215.5  
XK(34)= 1393.2  
XK(35)=1610.2

C

YK(1)= 1.38900E+00  
YK(2)= 1.39300E+00  
YK(3)= 1.38700E+00  
YK(4)= 1.37200E+00  
YK(5)= 1.33100E+00  
YK(6)= 1.26400E+00  
YK(7)= 1.16100E+00  
YK(8)= 9.64000E-01  
YK(9)= 6.16000E-01  
YK(10)=3.92000E-01  
YK(11)=8.29000E-01  
YK(12)=1.14200E+00  
YK(13)=1.41900E+00  
YK(14)=1.65700E+00  
YK(15)=1.86400E+00  
YK(16)=2.07000E+00  
YK(17)=2.27500E+00  
YK(18)=2.46200E+00  
YK(19)=2.65700E+00  
YK(20)=2.86900E+00  
YK(21)=3.09300E+00  
YK(22)=3.32400E+00  
YK(23)=3.58600E+00  
YK(24)=3.85800E+00  
YK(25)=4.15200E+00  
YK(26)=4.48300E+00  
YK(27)=4.83800E+00  
YK(28)=5.24200E+00  
YK(29)=5.72700E+00  
YK(30)=6.31200E+00  
YK(31)=6.99200E+00



YK(32)=7.79500E+00  
YK(33)=8.82800E+00  
YK(34)=1.01000E+01  
YK(35)=1.18500E+01

C

MK(1)= -0.0003008081  
MK(2)= -0.0003008081  
MK(3)= 1.580026E-005  
MK(4)= -0.0007139049  
MK(5)= -0.0001736024  
MK(6)= -0.0004512451  
MK(7)= -0.001434666  
MK(8)= -0.001597511  
MK(9)= -0.0002189577  
MK(10)= 0.01017516  
MK(11)= -0.004179221  
MK(12)= 0.0005716763  
MK(13)= -0.0008454766  
MK(14)= 2.622849E-005  
MK(15)= -0.0002650559  
MK(16)= 0.0001065387  
MK(17)= -0.0001848276  
MK(18)= -9.212307E-005  
MK(19)= 0.0001091794  
MK(20)= -0.0001149184  
MK(21)= 2.897708E-005  
MK(22)= 3.033301E-005  
MK(23)= -8.691511E-005  
MK(24)= 4.607977E-005  
MK(25)= -4.050878E-005  
MK(26)= 1.402204E-005  
MK(27)= -3.861147E-007  
MK(28)= -1.769247E-005  
MK(29)= 2.877102E-005  
MK(30)= -2.531625E-005  
MK(31)= 1.014666E-005  
MK(32)= 5.466382E-006  
MK(33)= -1.243508E-005  
MK(34)= 7.599362E-006  
MK(35)= 7.599362E-006

C-----

if(xx.gt.600.) then  
    refre=0.0755 - 0.000155\*xx + 2.15E-7\*xx\*xx  
    go to 29  
end if

C Basic calculations

J=2

10 IF (XX.LE.XN(J)) GO TO 20

J=J+1

GO TO 10

20 I=J

XN0=XN(I)-XX

XN1=XX-XN(I-1)

H=XN(I)-XN(I-1)

H2=H\*H/6.0

refre=MN(I-1)\*XN0\*XN0\*XN0/6./H+MN(I)\*XN1\*XN1\*XN1/6./H+  
+ (YN(I-1)-MN(I-1)\*H2)\*XN0/H+(YN(I)-MN(I)\*H2)\*XN1/H

29 J=2

30 IF (XX.LE.XK(J)) GO TO 40

J=J+1

GO TO 30

40 I=J

XN0=XK(I)-XX

XN1=XX-XK(I-1)

H=XK(I)-XK(I-1)

H2=H\*H/6.0

refim=MK(I-1)\*XN0\*XN0\*XN0/6./H+MK(I)\*XN1\*XN1\*XN1/6./H+  
+ (YK(I-1)-MK(I-1)\*H2)\*XN0/H+(YK(I)-MK(I)\*H2)\*XN1/H

C-----

```

c Correction to the size limiting effect
c Step1: calculation of the bulk parameter eps=eps1+ieps2
eps1=refre*refre-refim*refim
eps2=2.d0*refre*refim
C-----
c Step 2: Calculation of coorection terms
c WL=WAVEL
c WLP=136.1D0
c GB=0.0019D0
c pi=4.d0*datan(1.d0)
c GR=GB+0.0047*136.1/(2.0*pi*Rm)
c deps1=(WL/WLP)**2*(1.D0/(1.D0+(GB*WL/WLP)**2)-
c + 1.D0/(1.D0+(GR*WL/WLP)**2))
c deps2=(WL/WLP)**2*((GR*WL/WLP)/(1.D0+(GR*WL/WLP)**2)-
c + (GB*WL/WLP)/(1.D0+(GB*WL/WLP)**2))
c
C DEPS1=(OMPB/OM)**2*(1.D0/(1.D0+(GAMB/OM)**2)-
C + 1.D0/(1.D0+(GAMJ/OM)**2))
C DEPS2=(OMPB/OM)**2*((GAMJ/OM)/(1.D0+(GAMJ/OM)**2)-
C + (GAMB/OM)/(1.D0+(GAMB/OM)**2))
c Step 2: Calculation of the coorection term
c by using deps2 for IMAGINARY part of epsilon only!!!!
c PARAMETERS:
c hr=h/2/pi Reduced Plank constant=0.6582*10**(-15) eV*s
c [hr]*omega_p=9 eV Average value for silver (vary from 9.5 to 8.7 eV)
c Lambda_p=138 nm (1240/9eV)
c gamma_bulk~ 0.5-0.9 eV Here it is NOT USED
c A=1 (Note that A=2-3 according to Quinten BOOK)
c v_F/c=0.0047 for Silver (Granquist)
c hr*c/hr*omega_p=22 nm
c deps2=(A/Rm)*(wavel/400)**3*(400/lambda_p)**3*(v_F/c)*(hr*c)/(hr*omega_p)
c =2.5*(A/Rm)*(lambda/400)**3
c
deps1=0.d0
As=1.d0
deps2=2.5d0*(As/Rm)*(wavel/400.d0)**3.d0

eps1=eps1 + deps1
eps2=eps2 + deps2
c-----
c Step 3: Recalculation of tefre and refim: Bohren-Huffman, p.281
refre=dsqrt((dsqrt(eps1**2.d0+eps2**2.d0)+eps1)/2.d0)
refim=dsqrt((dsqrt(eps1**2.d0+eps2**2.d0)-eps1)/2.d0)

im=(0.d0,1.d0)
eps=eps1+im*eps2
ref=refre+im*refim
c-----
RETURN
END

```

#### Section S4. Comparison of small-particle approximations with LM theory for the absorption cross section

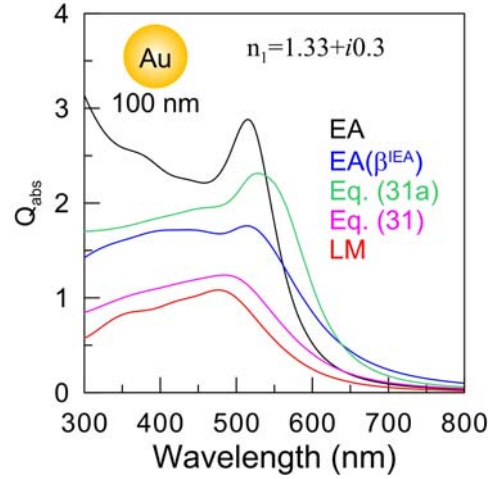

**Figure S3.** Absorption efficiency factors calculated by EA, EA with the IEA polarizability  $\beta^{\text{IEA}}$  (Eq. 30a), Eq. (31a), IEA (Eq. (31)), and LM theory for a 100-nm Au sphere in an absorbing host  $n_1 = 1.33 + i0.3$ .

**Section S5. Comparison of the EA and LM near-field and far-field efficiencies for Au spheres embedded in a lossless PMMA and a lossy P3HT matrix**

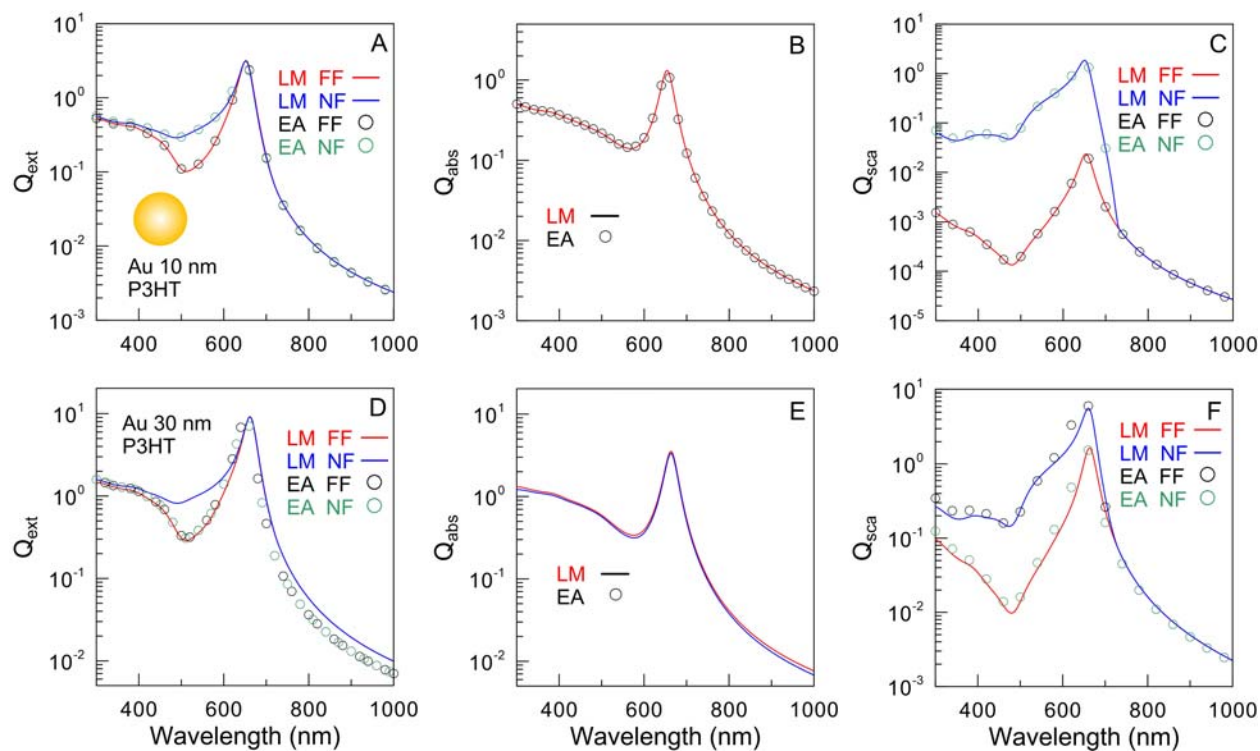

**Figure S4.** Far-field and near-field extinction (A, D), absorption (B, E), and scattering (C, F) efficiencies were calculated by the LM theory and the EA for 10-nm (A-C) and 30-nm Au spheres embedded in the P3HT matrix.

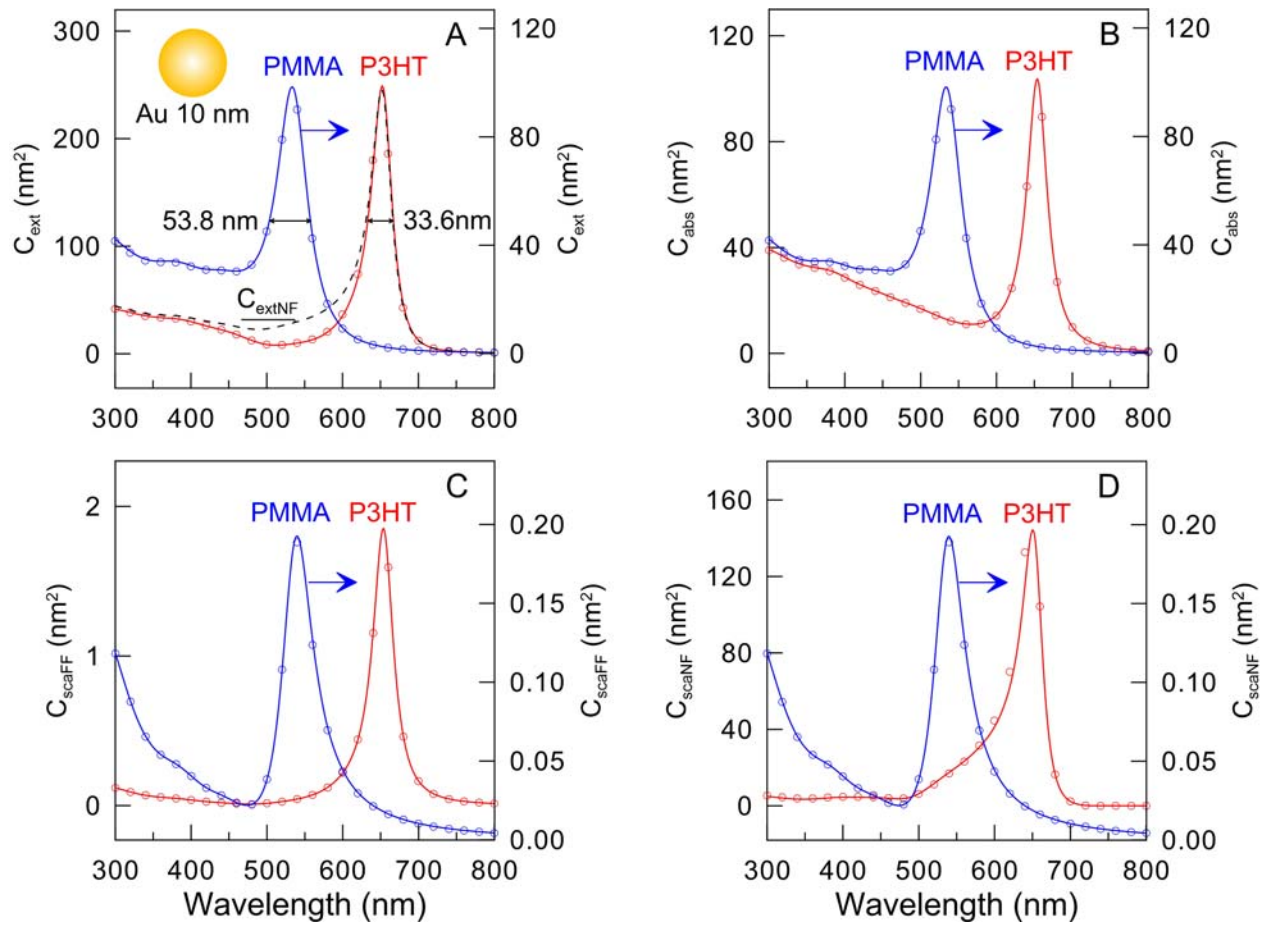

**Figure S5.** Cross sections from the LM theory (solid lines) and the EA approximation (circles). The extinction (A), absorption (B), near-field scattering (C), and far-field scattering (D) cross sections of a single 10-nm Au sphere embedded in a dielectric PMMA (blue lines) and a lossy P3HT (red lines) medium. The black dashed line in panel (A) shows the near-field extinction cross section. The black horizontal double arrows indicate the full width at half maximum of the extinction peaks.

**Section S6. Comparison of LM, IEA, and FDTD FF extinction and scattering spectra for - 10-nm Au sphere in lossy P3HT and dielectric water hosts.**

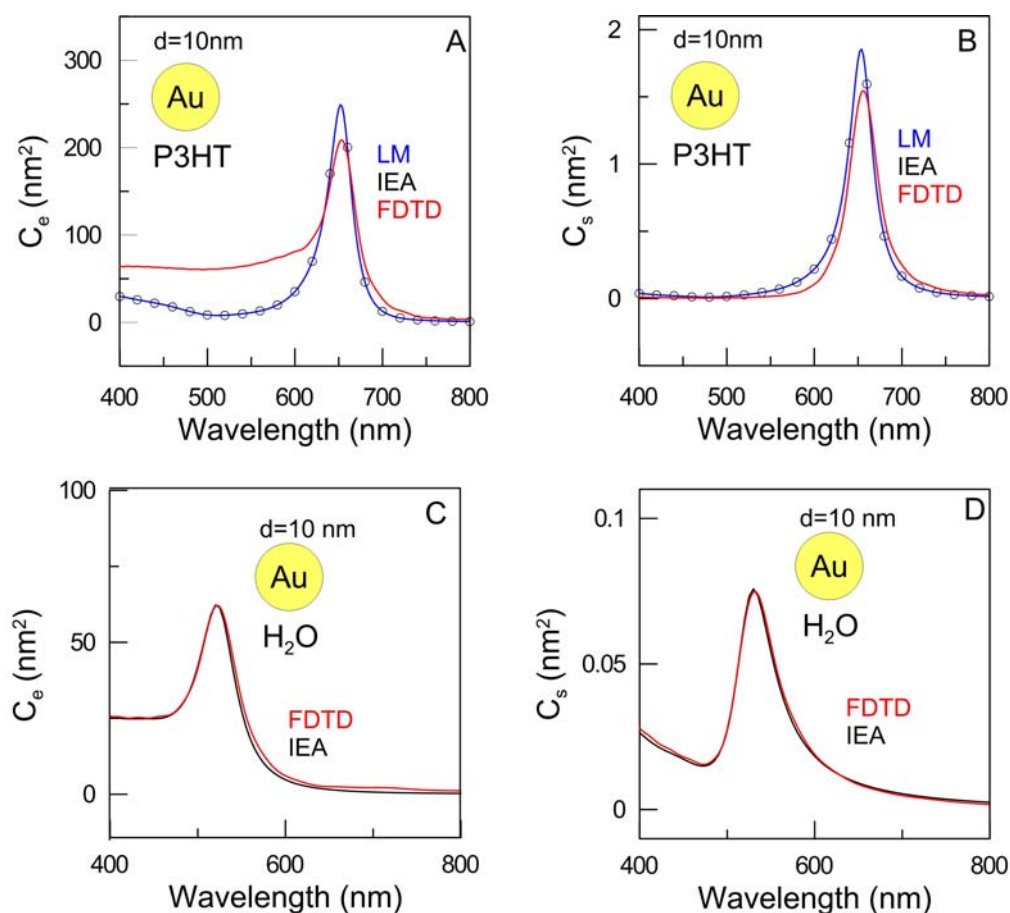

**Figure S6.** Extinction (A, C) and scattering (B, D) spectra of a 10-nm Au sphere in a lossy P3HT (A, B) and lossless water (C, D) hosts. Blue lines show LM simulations, black lines and circles show IEA simulations, and red lines show FDTD spectra. LM and IEA give perfect agreement for water hosts, and FDTD spectra are very close to IEA. However, for P3HT host, FDTD extinction spectrum is strongly overestimated in the short wavelength region. By contrast, LM and IEA spectra are in perfect agreement.

**References**

1. E. C. Le Ru, W. R. C. Somerville, B. Augu  . Radiative correction in approximate treatments of electromagnetic scattering by point and body scatterers, *Phys. Rev. A* **2013**, 87, 012504.
2. M. I. Mishchenko, L. D. Travis and A. A. Lacis. *Scattering, Absorption, and Emission of Light by Small Particles*, Cambridge U. Press, Cambridge, UK, 2002.
3. H. H  vel, S. Fritz, A. Hilger, U. Kreibig and M. Vollmer. Width of cluster plasmon resonances: Bulk dielectric functions and chemical interface damping, *Phys. Rev. B*, 1993, **48**, 18178-18188.

4. C. Sönnichsen, T. Franzl, T. Wilk, G. von Plessen, J. Feldmann, O. Wilson and P. Mulvaney. Drastic reduction of plasmon damping in gold nanorods, *Phys. Rev. Lett.*, 2002, **88**, 077402.
5. U. Kreibig and L. Genzel. Optical absorption of small metallic particles, *Sur. Sci.*, 1985, **156**, 678–700.
6. B. Foerster, A. Joplin, K. Kaefer, S. Celiksoy, S. Link and C. Sönnichsen. Chemical interface damping depends on electrons reaching the surface, *ACS Nano*, 2017, **11**, 2886–2893.
7. B. Foerster, V. A. Spata, E. A. Carte, C. Sönnichsen and S. Link. Plasmon damping depends on the chemical nature of the nanoparticle interface, *Sci. Adv.*, 2019, **5**, eaav0704.
8. E. A. Coronado and G. C. Schatz, Surface plasmon broadening for arbitrary shape nanoparticles: A geometrical probability approach, *J. Chem. Phys.*, 2003, **119**, 3926.
9. C. G. Granqvist and O. Hunderi. Optical properties of ultrafine gold particles, *Phys Rev B* 1997, **16**, 3513.
10. P. B. Johnson and R. W. Christy. Optical constants of the noble metals, *Phys. Rev. B* 1972, **6**, 4370–4379.
11. S. Underwood and P. Mulvaney. Effect of the solution refractive index on the color of gold colloids, *Langmuir* 1994, **10**, 3427–3430.
12. C. Oubre and P. Nordlander. Optical properties of metallodielectric nanostructures calculated using the finite difference time domain method, *J. Phys. Chem. B* 2004, **108**, 17740–17747.
13. L. J. Mendoza Herrera, D. M. Arboleda, D. C. Schinca, L. B. Scaffardi. Determination of plasma frequency, damping constant, and size distribution from the complex dielectric function of noble metal nanoparticles, *Appl. Phys.* 2014, **116**, 233105.
14. R. L. Olmon, B. Slovick, T. W. Johnson, D. Shelton, S.-H. Oh, G. D. Boreman, M. B. Raschke. Optical dielectric function of gold, *Phys. Rev. B* 2012, **86**, 235147.
15. A. D. Rakić, A. B. Djurišić, J. M. Elazar, M. L. Majewski. Optical properties of metallic films for vertical-cavity optoelectronic devices, *Appl. Opt.* 1998, **37**, 5271–5283.
16. G. B. Irani, T. Huen and F. Wooten, Optical constants of silver and gold in the visible and vacuum ultraviolet, *J. Opt. Soc. Am.* 1971, **61**, 128–129.
17. L. G. Schulz. The optical constants of silver, gold, copper, and aluminum. I. The absorption coefficient  $k$ , *J. Opt. Soc. Am.*, 1954, **44**, 357–362.
18. L. G. Schulz and F. R. Tangherlini. Optical constants of silver, gold, copper, and aluminum. II. The index of refraction  $n$ . *J. Opt. Soc. Am.*, 1954, **44**, 362–368.
19. V. N. Zolotarev and E. V. Smirnova, *Optical Constants of Natural and Technical Media*. Leningrad, Khimia, 1984. (In Russian).

20. Y. Jiang, S. Pillai and M. A. Green. Re-evaluation of literature values of silver optical constants, *Opt. Express*, 2015, **23**, 2133–2144.
21. D. J. Nash and J. R. Sambles, Surface plasmon-polariton study of the optical dielectric function of silver, *J. Mod. Opt.*, 1996, **43**, 819–891.
22. M. Otter, Optische Konstanten massiver Metalle, *Z. Physik*, 1961, **161**, 163–178.
